# Supplementary material for: Identification of novel KRASG12D neoantigen specific TCRs and a strategy to eliminate off-target recognition
Source: PubMed Central journal article supplement — J Transl Med. 2025 Jan 17;23:78. doi: 10.1186/s12967-025-06094-1 (PMC11740425; doi:10.1186/s12967-025-06094-1), 2025-01-17
Supplement: 12967_2025_6094_MOESM1_ESM.pdf [file 12967_2025_6094_MOESM1_ESM.pdf]

## Supplementary Methods

### Peptide specificity profile using X-scan assay

To investigate TCR specificity using TCR T cells, a peptide library targeting the KRAS<sup>G12D</sup> peptide sequence (VVVGADGVGK) was designed and synthesized by Genscript (Supplementary Table 4). Each library member (n = 200) was individually presented to HLA-A\*11:01<sup>+</sup> K562 cells at a final concentration of 10  $\mu$ M. These cells were then co-cultured with TCR-transduced T cells. Following overnight incubation, the level of IFN- $\gamma$  secretion was quantified via ELISA. Background activation levels, as determined from DMSO-treated controls, were subtracted from all measured responses, which were then normalized with the DMSO group as 0% and the KRAS<sup>G12D</sup> group as 100%. A threshold of 20% reactivity relative to the KRAS<sup>G12D</sup> induced response was as a cutoff to define a TCR recognition motif, facilitating the identification of allowable amino acids at each position within the peptide sequence. This TCR recognition motif was subsequently utilized to scan the UniProtKB human proteome database using the ScanProsite tool, searching for homologous peptide sequences potentially cross-recognized by the TCR. NetMHCpan-4.1 was utilized to filter out peptides capable of binding to HLA, which were then utilized for validation in subsequent minigene experiments.

Each minigene encodes a 10mer homologous peptide, flanked by 10 native amino acids from the corresponding protein. A total of 10 such minigenes were strung to form a minigene-cluster (MC), which was then fused with NGFR gene (Uniprot ID P08138, residues 29-275) through the P2A linker to generate a bicistronic MC-NGFR construct. The codon-optimized MC-NGFR constructs were cloned into the pWPXL vector for production of lentiviral particles. HLA-A\*11:01<sup>+</sup> K562 cells were transduced with these lentiviral particles to express the minigene-cluster, with the NGFR protein serving as a marker for quality control of viral transduction efficiency. Co-culturing TCR T cells with these engineered K562 cells, the expression of the CD137 was analyzed via flow cytometry after 24 hours. A P64 minigene, encoding an HLA-A\*11:01-restricted epitope from the COVID-19 N protein (KTFPPTEPK) and known to activate P64 TCR, was included in each minigene-cluster as a positive control. This setup ensures the proper intracellular processing and presentation of minigenes.

To evaluate TCR specificity using TCR Jurkat cells, each library component was individually applied to HLA-A\*11:01<sup>+</sup> K562 cells at a 10  $\mu$ M concentration, followed by co-culturing with

TCR Jurkat cells. After 6 hours, Cells were stained with APC-anti-human CD69 antibody for 10 minutes at 4°C in the dark. After washing twice with PBS, flow cytometry was performed to analyze the expression of the CD69. To compare data across different TCRs, results were normalized with the DMSO group as 0% activation and the KRAS<sup>G12D</sup> group as 100% activation.

### **The design and Screening of TCR library**

The workflow includes a three-stage process.

**Stage-I:** Design of the TCR Library. Based on structural data from the TCR JDI, amino acid residues within the CDR region critical for the interaction with pHLA were identified. For the construction of mutation libraries, two regions of the CDR were selected. The first library, named TCR1 Lib1, encompassed a saturation mutation library targeting four consecutive sites (G111 to N113) proximal to the peptide interaction within the CDR-3B. The second library, TCR1 Lib2, consisted of a saturation mutation library at three consecutive sites (D29 to T36) nearest to the HLA interaction within CDR-1A. The DNA for the two TCR libraries was synthesized and subsequently cloned into the pWPXL plasmid by GenScript. Extraction of TCR library plasmids was also prepared by GenScript. The IMGT numbering scheme was employed to describe the positions of amino acids within the TCR (Supplementary Table 7), facilitating direct comparisons across different T cell receptors.

**Stage-II:** TCR Library Display by Jurkat Cells. Recombinant lentiviruses encoding the TCR library were generated through the transfection of HEK293T cells with the TCR library plasmids and packaging plasmids (psPAX2 and pMD2.G). Viral titer was determined to achieve an approximate 10% positive expression of mouse TCR in CD8<sup>+</sup> Jurkat cells, ensuring each cell expressed only one copy of TCR variant. The saturation mutation library across four sites contained 1.6E5 TCR variants. To prepare a TCR library Jurkat cells covering 100X the library capacity, an initial cell count of 1.6E8 CD8<sup>+</sup> Jurkat cells was utilized for lentiviruses infection. 24 hours later post-transfection, TCR library Jurkat cells were harvested and resuspended at a concentration of 2E5/ml in G-Rex 100 (Wilson Wolf). Two days post-transfection, 50% of the culture medium volume was replaced with fresh medium. Three days post-transfection, TCR library Jurkat cells were harvested for downstream screening procedure.

**Stage-III:** Screening of the TCR Library. The screening of the TCR library was performed over five rounds to ensure the enrichment and selection of functional TCR clones with specificity for

the KRAS<sup>G12D</sup> mutation. Round 01: Enrichment for TCR Expression. 2.0E7 TCR library Jurkat cells were stained with APC-anti-mouse TCR  $\beta$ -chain antibody. Utilizing the EasySep™ APC Positive Selection Kit (STEMCELL Technologies), TCR clones exhibiting normal TCR expression on the cell membrane were enriched following the manufacturer's protocol. Round 02: Specificity for KRAS<sup>G12D</sup> Tetramer. 2.0E7 TCR library Jurkat cells was stained with both the APC-anti-mouse TCR  $\beta$  chain antibody and PE-KRAS<sup>G12D</sup> Tetramer. mTCR<sup>+</sup> KRAS<sup>G12D</sup> Tet<sup>+</sup> TCR clones were sorted. Round 03 and Round 04: Enrichment for Functional clones. HLA-A\*11:01<sup>+</sup> K562 cells were pulsed with 10  $\mu$ M of the KRAS<sup>G12D</sup> peptide and then co-cultured with the TCR library Jurkat cells. Six hours post-co-culture, the cells were stained with PE-anti-mouse TCR  $\beta$  chain antibody, APC-anti-human CD69 antibody and BV421-anti-human CD62L antibody. This panel could distinguish between specific activated (CD62L<sup>-</sup> CD69<sup>+</sup>) and non-specific activated (CD62L<sup>+</sup> CD69<sup>+</sup>) cells. The top 10% of CD62L<sup>-</sup> CD69<sup>+</sup> cells displaying the highest MFI of CD69 were sorted. Each enrichment process required 10 to 14 days to propagate sufficient cells for subsequent round. Round 05: Isolation of Specific Clones. clones were stained with PE-SMC1A<sub>29-38</sub> Tetramer and APC-KRAS<sup>G12D</sup> Tetramer, KRAS<sup>G12D</sup> Tetramer<sup>+</sup> SMC1A Tetramer<sup>-</sup> TCR clones were sorted into a 96-well PCR plate via single-cell FACS. The TCR $\alpha$  and TCR $\beta$  chain genes of the single cell were amplified under previously described conditions, with specific primers (Supplementary Table 12). The TCR repertoire of these clones was then analyzed using the IMGT/HighV-QUEST tool.

### Supplementary Figure Legend

**Supplementary Fig. 1** Flow cytometry gating strategy in experimental analysis. Gating strategy of single cell sorting for KRAS<sup>G12D</sup> specific T cells.

**Supplementary Fig. 2** Design and expression analysis of minigene-cluster. a. Schematic representation of the minigene-cluster construct is shown. The complete expression framework includes a minigene-cluster, a 2A element, and NGFR. The minigene-cluster comprises 10 minigenes, each encoding a 10-mer homologous peptide flanked by 10 native amino acids from the corresponding protein. Within each minigene-cluster, there is a SARS-CoV-2 NP<sub>361-369</sub> minigene, encoding the NP<sub>361-369</sub> peptide from the SARS-CoV-2 N protein known to activate the

P64 TCR. The SARS-CoV-2 NP<sub>361-369</sub> minigene is utilized to ensure the proper intracellular processing and presentation of MC. NGFR serves as a marker to monitor the expression efficiency of the minigene-cluster construct within cells. b. HLA-A\*11:01<sup>+</sup> K562 cells expressing the MC construct were enriched and then stained with an anti-NGFR antibody to assess the expression efficiency of MC. c. The SMC1A<sub>29-38</sub> peptide exhibits sequence conservation across multiple mammalian species. Panel b represent data from two independent experiments with n = 2. NGFR, nerve growth factor receptor.

**Supplementary Fig. 3** Peptide specificity similarities between TCR1 with JDI TCR. TCR Jurkat cells were co-cultured with HLA-A\*11:01<sup>+</sup> K562 cells that were exogenously loaded with various concentrations of the KRAS<sup>G12D</sup> (a) or SMC1A<sub>29-38</sub> peptide (b). After 6 hours, the expression of CD69 was assessed. c. The reactivity of TCR1 Jurkat cells and TCR1 T cells towards KRAS<sup>G12D</sup> peptide library were compared. Each point on the graph represents an individual peptide, with the x-axis indicating the reactivity of TCR1 T cells and the y-axis showing the reactivity of TCR1 Jurkat cells to the respective peptides. To facilitate comparison across different detection methods, the percentages of CD69 expression and the concentration of IFN- $\gamma$  release were normalized, setting the reactivity of the DMSO control group as 0% activation and the reactivity to the KRAS<sup>G12D</sup> peptide as 100% activation. Peptide specificity profiling of TCR1 Jurkat (d), JDI TCR Jurkat (e) and TIL4373 TCR (f) were conducted using an X-scan assay. To compare data across different TCRs, the result of CD69<sup>+</sup> percent was normalized with the DMSO group set as 0% activation and the KRAS<sup>G12D</sup> group set as 100% activation. g. The reactivity of TCR1 and JDI TCR to the KRAS<sup>G12D</sup> peptide library were compared. Panel a, b and c represents data from two independent experiments with n = 2. Panel d, e and f represent data from two independent experiments with n = 1.

**Supplementary Fig. 4** Structural similarities between TCR1 with JDI TCR. a. The AA sequences of the CDR regions from TCR1 and JDI TCR are displayed. The sequences in the CDR-1A, CDR-2A, and CDR-3B regions are identical between the two TCRs ( in bold black). b. A top view of the JDI TCR/pHLA complex is presented. Regions of JDI TCR within 5 Å of the KRAS<sup>G12D</sup> pHLA include 1 $\alpha$  (colored in orange), 3 $\alpha$  (colored in yellow), and 3 $\beta$  (colored in

green). c. A detailed residue interactions between JDI TCR and the KRAS<sup>G12D</sup> peptide-HLA is shown. Hydrogen bonds are marked with black dashed lines, and the AA numbers forming Hydrogen bonds are displayed. d. The residue T30 in the CDR-1A region of JDI TCR forms a hydrogen bond with HLA. e. Mutation of the T30 AA site in TCR1 resulted in changes in binding affinity and functional avidity to KRAS<sup>G12D</sup> pHLA. Panel e represents data from two independent experiments with n = 2. The IMGT numbering scheme (Supplementary Table 7) was used to describe AA positions within the TCR. 1 $\alpha$ , TCR CDR-1A. 3 $\alpha$ , TCR CDR-3A. 3 $\beta$ , TCR CDR-3B. AA, amino acid.

**Supplementary Fig. 5** Structure-guided designing and functional screening of TCR1 libraries. Two regions of JDI TCR interacting with pHLA were targeted to construct TCR libraries. TCR1 Lib1 (a) was established as a saturation mutation library encompassing four sequential sites proximal to the peptide interaction region (CDR-3B: G111 to N113). TCR1 Lib2 (b) included a saturation mutation library covering three sequential sites nearest to the HLA interaction region (CDR-1A: D29 to T36). c. The five rounds of TCR screening were employed to enrich for functional TCR clones. Both libraries underwent the same selection strategy, with the left side illustrating the screening process for TCR1 Lib1 and the right side for TCR1 Lib2. During Round-1, TCR library Jurkat cells were stained with an anti-mouse antibody to enrich clones displaying normal TCR expression on the cell membrane. In Round-2, cells stained with the KRAS<sup>G12D</sup> Tetramer enabled the enrichment of clones that showed binding activity to the KRAS<sup>G12D</sup> Tetramer. For Rounds-03 and 04, cells co-cultured with HLA-A\*11:01<sup>+</sup> K562 cells loaded with 10 $\mu$ M KRAS<sup>G12D</sup> for 6 hours and then were stained with anti-CD69 and anti-CD62L antibodies, allowing the sorting of peptide-specifically activated TCR clones (CD62L<sup>-</sup> CD69<sup>+</sup>). In Round-5, cells were stained with SMC1A<sub>29-38</sub> Tetramer and KRAS<sup>G12D</sup> Tetramer to eliminate clones capable of cross-recognizing SMC1A<sub>29-38</sub>, sorting those binding only to the KRAS<sup>G12D</sup> Tetramer for TCR cloning and sequencing. Following five rounds of TCR screening, TCR clone sequences were obtained through single-cell TCR cloning and the frequency of TCR clones were analyzed in TCR1 Lib1 (d) and TCR1 Lib2 (e). TCRs sharing the same AAs in CDR-3B in TCR1 Lib1 were classified as a TCR clone and TCRs sharing the same AAs in CDR-1A in TCR1 Lib2 were classified as a TCR clone, with clones appearing not less than twice were used to analyze the

frequency within the TCR library. WebLogo shows enriched peptide sequences from the fifth round of selection, where the size of each AA letter reflects its abundance at specific positions within the CDR region. The libraries screening process was conducted once, with Panel c representing data from a single experiment. The IMGT numbering scheme was used to describe AA positions within the TCR.

**Supplementary Fig. 6** Comparison of peptide specificity among three KRAS<sup>G12D</sup> specific TCR clones. Comparison of TCR1, TCR1a1, and TCR1a7 reactivity to the KRAS<sup>G12D</sup> peptide library, TCR1a1 and TCR1a exhibited enhanced discrimination capability for the 7th amino acid.

**Supplementary Fig. 7** Impact of endogenous TCR knockout on TCR1a7 peptide specificity. a. TCR T cells were stained with anti-mouse TCR antibodies to evaluate the expression efficiency of exogenous TCRs, with anti-human TCR antibodies to assess the efficiency of human TCR knockout, and with KRAS<sup>G12D</sup> Tetramer to assess the binding capacity to KRAS<sup>G12D</sup>-HLA complex. b. Results from panel a were quantified (n=3). c. hTCR-KO TCR1a7 T cells were co-cultured with HLA-A\*11:01<sup>+</sup> COS-7 cells endogenously expressing the full-length SMC1A gene. After 24 hours, CD137 expression of TCR T cells was analyzed, with E7 TCR serving as the negative control. d. Comparison of the reactivity of TCR1 and TCR1a7 towards KRAS<sup>G12D</sup> peptide library belonging to 7th amino acid of the epitope, normalized data are displayed as a heatmap. e. Homologous peptides of TCR recognition (binders) were categorized into those with low binding affinity to HLA-A\*11:01 (weak binders) and those with high binding affinity (high binders). Significance was determined using a two-sided Student's t-test (\*\*P < 0.01). Data are presented as mean ± SD. Panel a and c represent data from two independent experiments with n = 3. Panel d represents data from two independent experiments with n = 2.

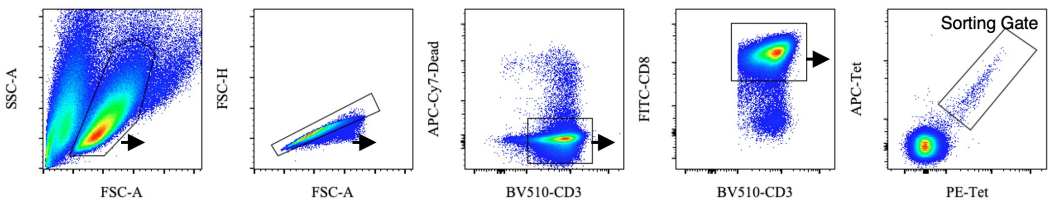

**Supplementary Fig. 1** Flow cytometry gating strategy in experimental analysis

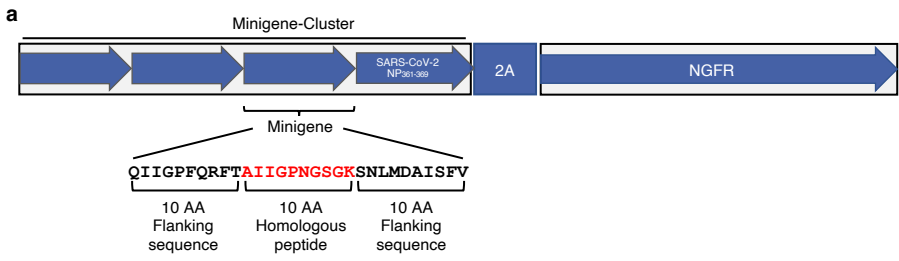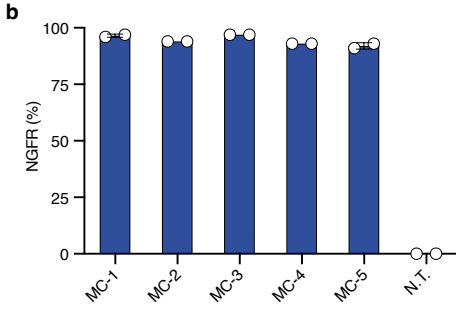

**c**

KRAS<sup>G12D</sup> : V V V G A D G V G K

SMC1A<sub>29-38</sub> : A I I G P N G S G K

SMC1A :

|        |                              |
|--------|------------------------------|
| Human  | FT A I I G P N G S G K S N L |
| Monkey | FT A I I G P N G S G K S N L |
| Rat    | FT A I I G P N G S G K S N L |
| Mouse  | FT A I I G P N G S G K S N L |
| Bovine | FT A I I G P N G S G K S N L |
| Pig    | FT A I I G P N G S G K S N L |

Supplementary Fig. 2 Design and expression analysis of minigene-cluster



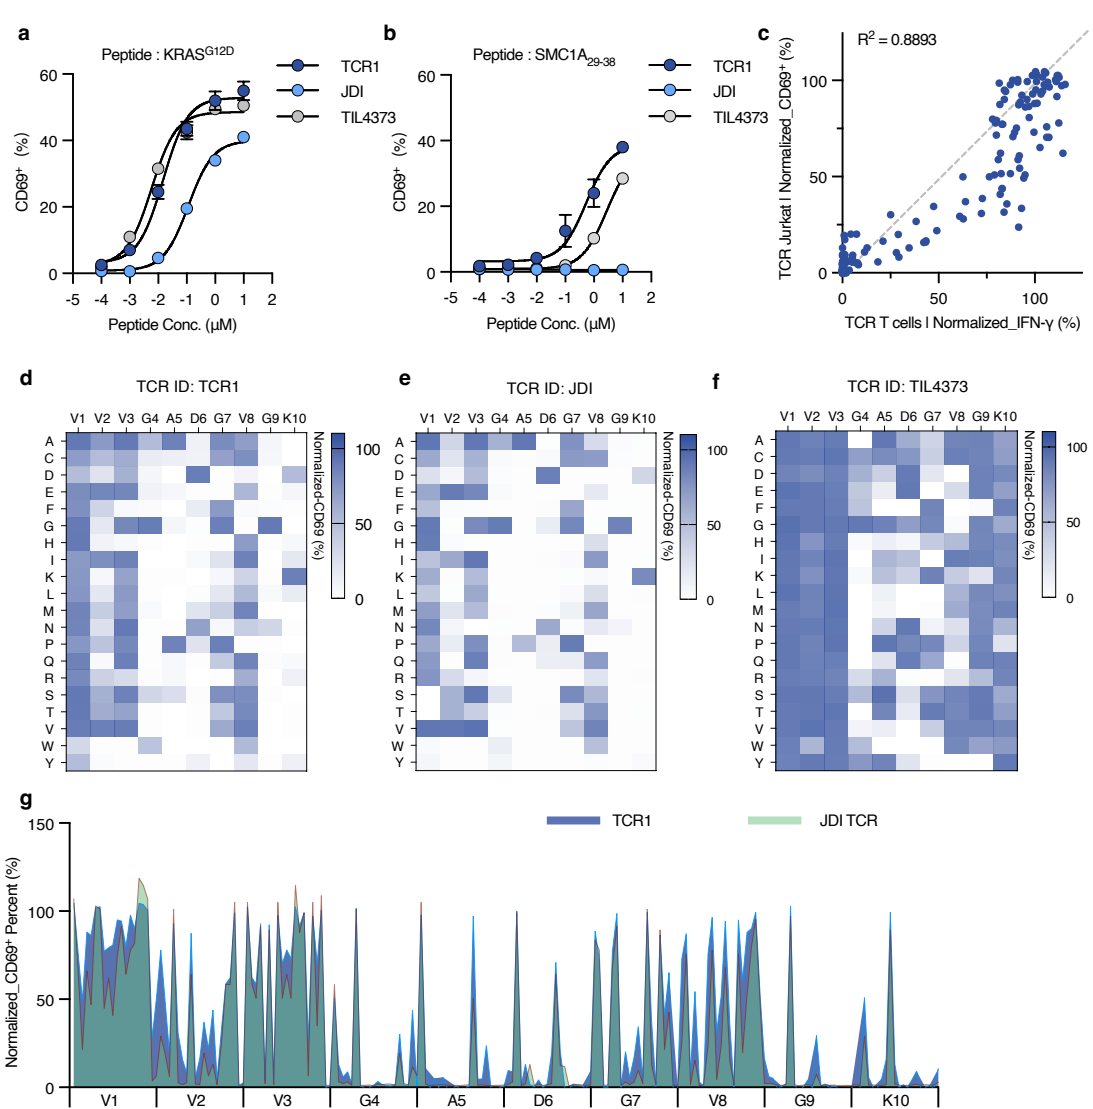

**Supplementary Fig. 3 Peptide specificity similarities between TCR1 with JDI TCR**

**a**

| TCR ID  | CDR-1A        | CDR-2A          | CDR-3A         | CDR-1B | CDR-2B | CDR-3B                |
|---------|---------------|-----------------|----------------|--------|--------|-----------------------|
| TCR1    | <b>TRDTTY</b> | <b>RNSFDEQN</b> | ALSGPSTSGTYKYI | SGDLS  | YYNGEE | <b>ASSVGPQQNNSPLH</b> |
| JDI TCR | <b>TRDTTY</b> | <b>RNSFDEQN</b> | ALSGPSGAGSYQLT | MNHEY  | SVGEGT | <b>ASSYGPQQHNSPLH</b> |

**b**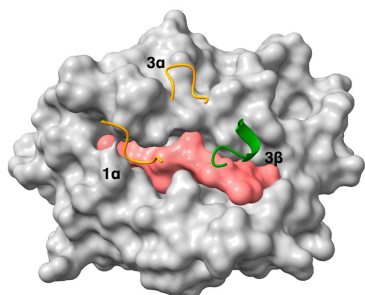**c**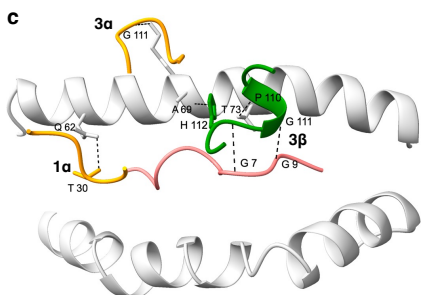**d**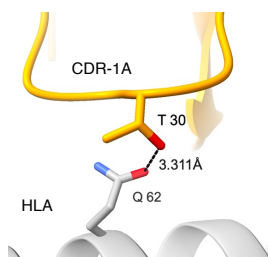**e**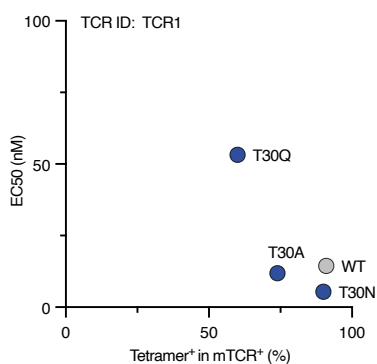

**Supplementary Fig. 4 Structural similarities between TCR1 with JDI TCR**

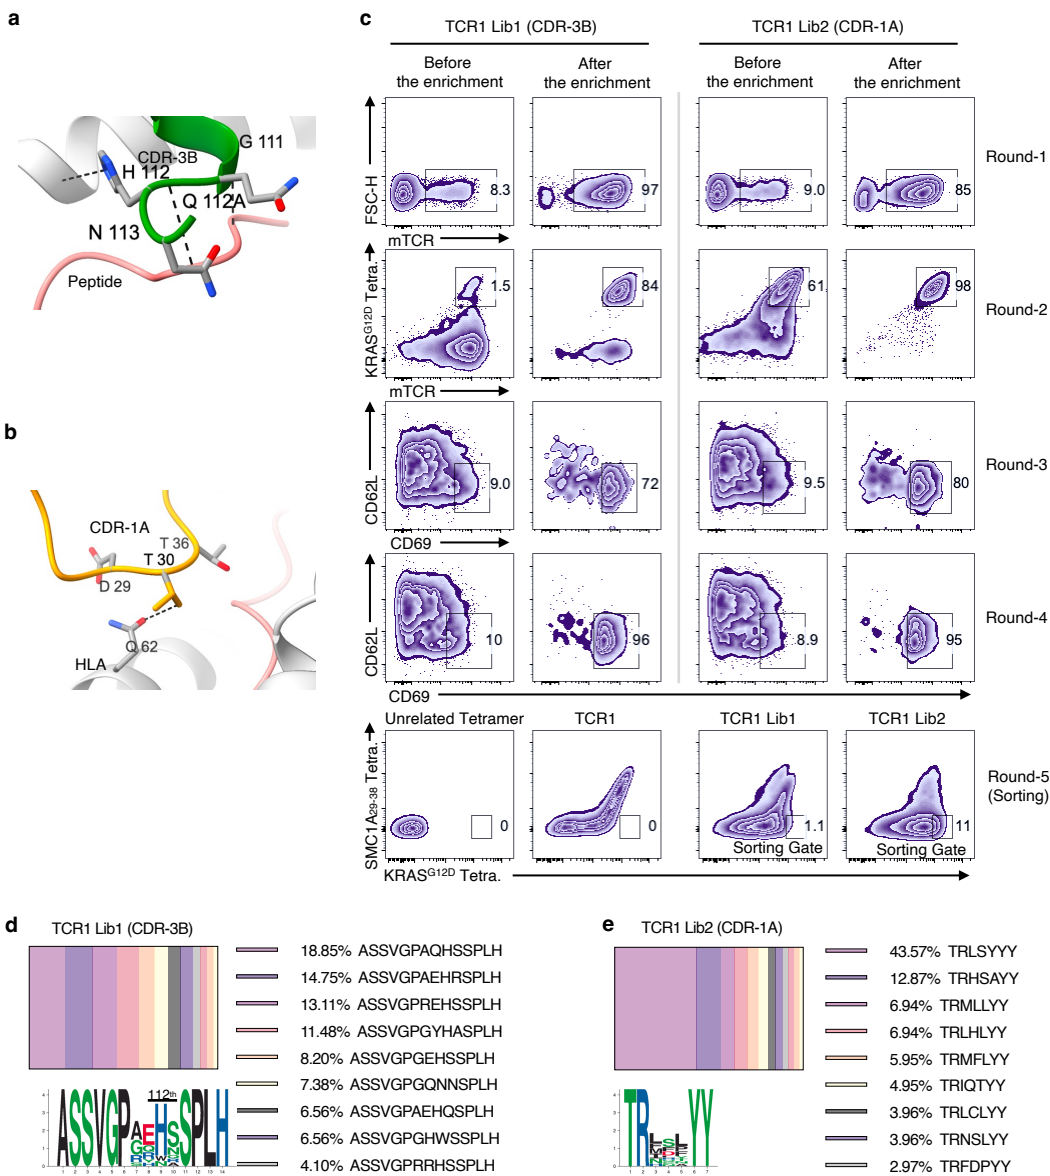

Supplementary Fig. 5 Structure-guided designing and functional screening of TCR1 libraries

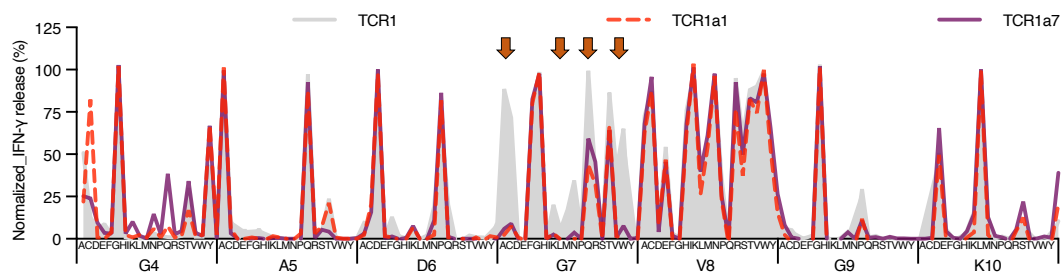

**Supplementary Fig. 6 Comparison of peptide specificity among three KRASG12D specific TCR clones**

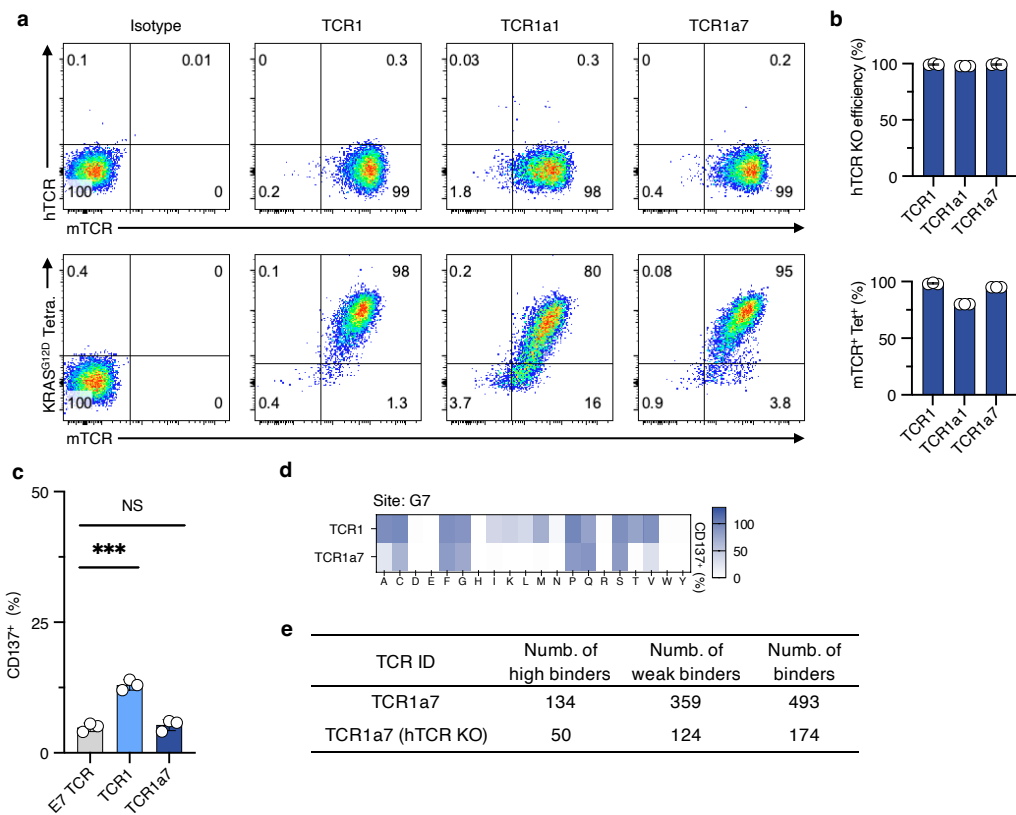

**Supplementary Fig. 7 Impact of endogenous TCR knockout on TCR1a7 peptide specificity**

**List of Supplementary Tables :**

| <b>ID</b>              | <b>Title</b>                                                           |
|------------------------|------------------------------------------------------------------------|
| Supplementary Table 1  | List of peptides in the study                                          |
| Supplementary Table 2  | List of antibodies used in the flow cytometry                          |
| Supplementary Table 3  | Sequences of HLA-A*11:01 restricted KRAS <sup>G12D</sup> specific TCRs |
| Supplementary Table 4  | The KRAS G12D peptide library used for X-scan analysis                 |
| Supplementary Table 5  | TCR recognition motifs                                                 |
| Supplementary Table 6  | Homologous peptides and minigene-clusters for TCR1 T cells             |
| Supplementary Table 7  | The IMGT numbering scheme for TCR1's CDRs                              |
| Supplementary Table 8  | The information of 24 TCR clones derived from TCR1 libraries           |
| Supplementary Table 9  | Functional evaluation process of 24 TCR clones from TCR1 libraries     |
| Supplementary Table 10 | Homologous peptides for TCR1a7 T cells                                 |
| Supplementary Table 11 | Homologous peptides and minigene-clusters for hTCR-KO TCR1a7 T cells   |
| Supplementary Table 12 | List of primers used for TCR cloning derived from TCR1 libraries       |

Supplementary Table 1. List of peptides in the study

| Peptide ID | Peptide Name           | HLA   | Peptide sequence | Length | Antigen Type      | Uniprot ID | Reference (PMID) | Note                                                               |
|------------|------------------------|-------|------------------|--------|-------------------|------------|------------------|--------------------------------------------------------------------|
| 1          | KRAS <sup>WT</sup>     | A0301 | VVVGACGVGK       | 10     | Self-antigen      | P01116     | 35474673         | wild type KRAS peptide                                             |
| 2          | KRAS <sup>G12D</sup>   | A0301 | VVVGADGVGK       | 10     | Neoantigen        | P01116     | 35474673         | KRAS <sup>G12D</sup> peptide                                       |
| 3          | HPV16_E7               | A0201 | YMLDLQPET        | 9      | Virus, HPV16      | P03129     | 22566864         | the epitope of E7 TCR                                              |
| 4          | NP <sub>361-369</sub>  | A1101 | KTFPPTPEPK       | 9      | Virus, SARS-CoV-2 | P0DTC9     | 34222571         | the epitope of P64 TCR                                             |
| 5          | DNHD1                  | A1101 | TVLGPNGVGK       | 10     | Self-antigen      | Q96M86     | this article     | 10 homologous peptide of TCR1, corresponding to Minigene-cluster 1 |
| 6          | CMA1A                  | A1101 | MVMGPNTVGK       | 10     | Self-antigen      | Q96PU9     | this article     |                                                                    |
| 7          | SEM3D                  | A1101 | SGTASDFLGK       | 10     | Self-antigen      | O95025     | this article     |                                                                    |
| 8          | ANK3                   | A1101 | KSASPDAAGK       | 10     | Self-antigen      | Q12955     | this article     |                                                                    |
| 9          | SE1L2                  | A1101 | QRTSSNVINK       | 10     | Self-antigen      | Q5TEA6     | this article     |                                                                    |
| 10         | PEX13                  | A1101 | VPVAPDSIGK       | 10     | Self-antigen      | Q92968     | this article     |                                                                    |
| 11         | APC                    | A1101 | SVSSSDGYGK       | 10     | Self-antigen      | P25054     | this article     |                                                                    |
| 12         | SMC1A <sub>29-38</sub> | A1101 | AIIGPNGSGK       | 10     | Self-antigen      | Q14683     | this article     |                                                                    |
| 13         | CSF1R                  | A1101 | SCVASNVQGK       | 10     | Self-antigen      | P07333     | this article     |                                                                    |
| 14         | FHDC1                  | A1101 | SVGSSDPENK       | 10     | Self-antigen      | Q9C0D6     | this article     |                                                                    |

Supplementary Table 2. List of antibodies used in the flow cytometry

| ID | Antibody Name                                        | Supplier  | Catalogue number | Final staining Concentration |
|----|------------------------------------------------------|-----------|------------------|------------------------------|
| 1  | BV510 anti-Human CD3 Antibody (Clone: SK7)           | Biolegend | 344828           | 1 µg/ml                      |
| 2  | FITC anti-human CD8a Antibody (Clone: HIT8a)         | Biolegend | 300906           | 1 µg/ml                      |
| 3  | BV510 anti-human CD8a Antibody (Clone: HIT8a)        | Biolegend | 300934           | 1 µg/ml                      |
| 4  | BV421 anti-human CD62L Antibody (Clone: DREG-56)     | Biolegend | 304828           | 1 µg/ml                      |
| 5  | APC anti-human CD69 Antibody (Clone: FN50)           | Biolegend | 310910           | 1 µg/ml                      |
| 6  | PE anti-human CD137 (Clone: 4B4-1)                   | Biolegend | 309804           | 1 µg/ml                      |
| 7  | APC anti-human TCR α/β Antibody (Clone: IP26)        | Biolegend | 306718           | 1 µg/ml                      |
| 8  | PE anti-mouse TCR β chain Antibody (Clone: H57-597)  | Biolegend | 109208           | 1 µg/ml                      |
| 9  | APC anti-mouse TCR β chain Antibody (Clone: H57-597) | Biolegend | 109212           | 1 µg/ml                      |
| 10 | PE anti-human CD271 (NGFR) Antibody (Clone: ME20.4)  | Biolegend | 345106           | 1 µg/ml                      |



Supplementary Table 3. Sequences of HLA-A\*11:01 restricted KRAS<sup>G12D</sup> specific TCRs

| ID | TCR Name    | TRAV   | TRAJ   | TRBV    | TRBJ    | CDR-3A           | CDR-3B          | PMID         |
|----|-------------|--------|--------|---------|---------|------------------|-----------------|--------------|
| 1  | TCR1        | TRAV19 | TRAJ40 | TRBV9   | TRBJ1-6 | ALSGPSTSGTYKYI   | ASSVGPGQNNNSPLH | This article |
| 2  | TCR2        | TRAV19 | TRAJ33 | TRBV6-1 | TRBJ2-7 | ALTSPDSNYQLI     | ASRVNWAYEQY     | This article |
| 3  | JDI TCR     | TRAV19 | TRAJ28 | TRBV6-2 | TRBJ1-6 | ALSGPSGAGSYQLT   | ASSYGPGQHNSPLH  | 36088370     |
| 4  | TIL4373 TCR | TRAV23 | TRAJ18 | TRBV5-1 | TRBJ2-1 | AAEAGNHRGSTLGRLY | ASSLAAGGYFNEQF  | 34168045     |

Supplementary Table 4. The KRAS G12D peptide library used for X-scan analysis

| ID | Peptide Name | Sequence   |
|----|--------------|------------|
| 1  | KS12D-1      | AVVGADGVGK |
| 2  | KS12D-2      | CVVGADGVGK |
| 3  | KS12D-3      | DVVGADGVGK |
| 4  | KS12D-4      | EVVGADGVGK |
| 5  | KS12D-5      | FVVGADGVGK |
| 6  | KS12D-6      | GVVGADGVGK |
| 7  | KS12D-7      | HVVGADGVGK |
| 8  | KS12D-8      | IVVGADGVGK |
| 9  | KS12D-9      | KVVGADGVGK |
| 10 | KS12D-10     | LVVGADGVGK |
| 11 | KS12D-11     | MVVGADGVGK |
| 12 | KS12D-12     | NVVGADGVGK |
| 13 | KS12D-13     | PVVGADGVGK |
| 14 | KS12D-14     | QVVGADGVGK |
| 15 | KS12D-15     | RVVGADGVGK |
| 16 | KS12D-16     | SVVGADGVGK |
| 17 | KS12D-17     | TVVGADGVGK |
| 18 | KS12D-18     | VVVGADGVGK |
| 19 | KS12D-19     | WVVGADGVGK |
| 20 | KS12D-20     | YVVGADGVGK |
| 21 | KS12D-21     | VAVGADGVGK |
| 22 | KS12D-22     | VCVGADGVGK |
| 23 | KS12D-23     | VDVGADGVGK |
| 24 | KS12D-24     | VEVGADGVGK |
| 25 | KS12D-25     | VFVGADGVGK |
| 26 | KS12D-26     | VGVGADGVGK |
| 27 | KS12D-27     | VHVGADGVGK |
| 28 | KS12D-28     | VIVGADGVGK |
| 29 | KS12D-29     | VKVGADGVGK |
| 30 | KS12D-30     | VLVGADGVGK |
| 31 | KS12D-31     | VMVGADGVGK |
| 32 | KS12D-32     | VNVGADGVGK |
| 33 | KS12D-33     | VPVGADGVGK |
| 34 | KS12D-34     | VQVGADGVGK |
| 35 | KS12D-35     | VRVGADGVGK |
| 36 | KS12D-36     | VSVGADGVGK |
| 37 | KS12D-37     | VTVGADGVGK |
| 38 | KS12D-38     | VVVGADGVGK |
| 39 | KS12D-39     | VWVGADGVGK |
| 40 | KS12D-40     | VYVGADGVGK |
| 41 | KS12D-41     | VVAGADGVGK |
| 42 | KS12D-42     | VVCGADGVGK |
| 43 | KS12D-43     | VVDGADGVGK |

|    |          |            |
|----|----------|------------|
| 44 | KS12D-44 | VVEGADGVGK |
| 45 | KS12D-45 | VVFGADGVGK |
| 46 | KS12D-46 | VVGGADGVGK |
| 47 | KS12D-47 | VVHGADGVGK |
| 48 | KS12D-48 | VVIGADGVGK |
| 49 | KS12D-49 | VVKGADGVGK |
| 50 | KS12D-50 | VVLGADGVGK |
| 51 | KS12D-51 | VVMGADGVGK |
| 52 | KS12D-52 | VVNGADGVGK |
| 53 | KS12D-53 | VVPGADGVGK |
| 54 | KS12D-54 | VVQGADGVGK |
| 55 | KS12D-55 | VVRGADGVGK |
| 56 | KS12D-56 | VVSGADGVGK |
| 57 | KS12D-57 | VVTGADGVGK |
| 58 | KS12D-58 | VVVGADGVGK |
| 59 | KS12D-59 | VVWGADGVGK |
| 60 | KS12D-60 | VVYGADGVGK |
| 61 | KS12D-61 | VVVAADGVGK |
| 62 | KS12D-62 | VVVCADGVGK |
| 63 | KS12D-63 | VVVDADGVGK |
| 64 | KS12D-64 | VVVEADGVGK |
| 65 | KS12D-65 | VVVFADGVGK |
| 66 | KS12D-66 | VVVGADGVGK |
| 67 | KS12D-67 | VVVHADGVGK |
| 68 | KS12D-68 | VVVIADGVGK |
| 69 | KS12D-69 | VVVKADGVGK |
| 70 | KS12D-70 | VVVLADGVGK |
| 71 | KS12D-71 | VVVMADGVGK |
| 72 | KS12D-72 | VVVNADGVGK |
| 73 | KS12D-73 | VVVPADGVGK |
| 74 | KS12D-74 | VVVQADGVGK |
| 75 | KS12D-75 | VVVRADGVGK |
| 76 | KS12D-76 | VVVSADGVGK |
| 77 | KS12D-77 | VVVTADGVGK |
| 78 | KS12D-78 | VVVVADGVGK |
| 79 | KS12D-79 | VVWADGVGK  |
| 80 | KS12D-80 | VVYADGVGK  |
| 81 | KS12D-81 | VVGADGVGK  |
| 82 | KS12D-82 | VVGCDGVGK  |
| 83 | KS12D-83 | VVGDDGVGK  |
| 84 | KS12D-84 | VVGEDGVGK  |
| 85 | KS12D-85 | VVGFDGVGK  |
| 86 | KS12D-86 | VVGGDGVGK  |
| 87 | KS12D-87 | VVGHDGVGK  |
| 88 | KS12D-88 | VVGIDGVGK  |

|     |           |             |
|-----|-----------|-------------|
| 89  | KS12D-89  | VVVGKDGVGK  |
| 90  | KS12D-90  | VVVGLDGVGK  |
| 91  | KS12D-91  | VVVGMDGVGK  |
| 92  | KS12D-92  | VVVGNDGVGK  |
| 93  | KS12D-93  | VVVGPDGVGK  |
| 94  | KS12D-94  | VVVGQDGVGK  |
| 95  | KS12D-95  | VVVG RDGVGK |
| 96  | KS12D-96  | VVVGSDGVGK  |
| 97  | KS12D-97  | VVVGTDGVGK  |
| 98  | KS12D-98  | VVVGVDGVGK  |
| 99  | KS12D-99  | VVVGWDGVGK  |
| 100 | KS12D-100 | VVVG YDGVGK |
| 101 | KS12D-101 | VVVG AAGVGK |
| 102 | KS12D-102 | VVVGACGVGK  |
| 103 | KS12D-103 | VVVGADGVGK  |
| 104 | KS12D-104 | VVVG AEGVGK |
| 105 | KS12D-105 | VVVGAFGVGK  |
| 106 | KS12D-106 | VVVGAGGVGK  |
| 107 | KS12D-107 | VVVG AHGVGK |
| 108 | KS12D-108 | VVVG AIGVGK |
| 109 | KS12D-109 | VVVG AKGVGK |
| 110 | KS12D-110 | VVVG ALGVGK |
| 111 | KS12D-111 | VVVG AMGVGK |
| 112 | KS12D-112 | VVVG ANGVGK |
| 113 | KS12D-113 | VVVG APGVGK |
| 114 | KS12D-114 | VVVG AQGVGK |
| 115 | KS12D-115 | VVVG ARGVGK |
| 116 | KS12D-116 | VVVG ASGVGK |
| 117 | KS12D-117 | VVVG ATGVGK |
| 118 | KS12D-118 | VVVG AVGVGK |
| 119 | KS12D-119 | VVVG AWGVGK |
| 120 | KS12D-120 | VVVG AYGVGK |
| 121 | KS12D-121 | VVVG ADAVGK |
| 122 | KS12D-122 | VVVG ADCVGK |
| 123 | KS12D-123 | VVVG ADDVGK |
| 124 | KS12D-124 | VVVG ADEVGK |
| 125 | KS12D-125 | VVVG ADFVGK |
| 126 | KS12D-126 | VVVG ADGVGK |
| 127 | KS12D-127 | VVVG ADHVGK |
| 128 | KS12D-128 | VVVG ADIVGK |
| 129 | KS12D-129 | VVVG ADKVGK |
| 130 | KS12D-130 | VVVG ADLVGK |
| 131 | KS12D-131 | VVVG ADMVGK |
| 132 | KS12D-132 | VVVG ADNVGK |
| 133 | KS12D-133 | VVVG ADPVGK |

|     |           |            |
|-----|-----------|------------|
| 134 | KS12D-134 | VVVGADQVGK |
| 135 | KS12D-135 | VVVGADRVGK |
| 136 | KS12D-136 | VVVGADSVGK |
| 137 | KS12D-137 | VVVGADTVGK |
| 138 | KS12D-138 | VVVGADVVGK |
| 139 | KS12D-139 | VVVGADWVGK |
| 140 | KS12D-140 | VVVGADYVGK |
| 141 | KS12D-141 | VVVGADGAGK |
| 142 | KS12D-142 | VVVGADGCGK |
| 143 | KS12D-143 | VVVGADGDGK |
| 144 | KS12D-144 | VVVGADGEGK |
| 145 | KS12D-145 | VVVGADGFGK |
| 146 | KS12D-146 | VVVGADGGGK |
| 147 | KS12D-147 | VVVGADGHGK |
| 148 | KS12D-148 | VVVGADGIGK |
| 149 | KS12D-149 | VVVGADGKGK |
| 150 | KS12D-150 | VVVGADGLGK |
| 151 | KS12D-151 | VVVGADGMGK |
| 152 | KS12D-152 | VVVGADGNGK |
| 153 | KS12D-153 | VVVGADGPGK |
| 154 | KS12D-154 | VVVGADGQGK |
| 155 | KS12D-155 | VVVGADGRGK |
| 156 | KS12D-156 | VVVGADGSGK |
| 157 | KS12D-157 | VVVGADGTGK |
| 158 | KS12D-158 | VVVGADGVGK |
| 159 | KS12D-159 | VVVGADGWGK |
| 160 | KS12D-160 | VVVGADGYGK |
| 161 | KS12D-161 | VVVGADGVAK |
| 162 | KS12D-162 | VVVGADGVCK |
| 163 | KS12D-163 | VVVGADGVDK |
| 164 | KS12D-164 | VVVGADGVEK |
| 165 | KS12D-165 | VVVGADGVFK |
| 166 | KS12D-166 | VVVGADGVGK |
| 167 | KS12D-167 | VVVGADGVHK |
| 168 | KS12D-168 | VVVGADGVIK |
| 169 | KS12D-169 | VVVGADGVKK |
| 170 | KS12D-170 | VVVGADGVLK |
| 171 | KS12D-171 | VVVGADGVMK |
| 172 | KS12D-172 | VVVGADGVNK |
| 173 | KS12D-173 | VVVGADGVPK |
| 174 | KS12D-174 | VVVGADGVQK |
| 175 | KS12D-175 | VVVGADGVRK |
| 176 | KS12D-176 | VVVGADGVSK |
| 177 | KS12D-177 | VVVGADGVTK |
| 178 | KS12D-178 | VVVGADGVVK |

|     |           |            |
|-----|-----------|------------|
| 179 | KS12D-179 | VVVGADGVWK |
| 180 | KS12D-180 | VVVGADGVYK |
| 181 | KS12D-181 | VVVGADGVGA |
| 182 | KS12D-182 | VVVGADGVGC |
| 183 | KS12D-183 | VVVGADGVGD |
| 184 | KS12D-184 | VVVGADGVGE |
| 185 | KS12D-185 | VVVGADGVGF |
| 186 | KS12D-186 | VVVGADGVGG |
| 187 | KS12D-187 | VVVGADGVGH |
| 188 | KS12D-188 | VVVGADGVGI |
| 189 | KS12D-189 | VVVGADGVGK |
| 190 | KS12D-190 | VVVGADGVGL |
| 191 | KS12D-191 | VVVGADGVGM |
| 192 | KS12D-192 | VVVGADGVGN |
| 193 | KS12D-193 | VVVGADGVGP |
| 194 | KS12D-194 | VVVGADGVGQ |
| 195 | KS12D-195 | VVVGADGVGR |
| 196 | KS12D-196 | VVVGADGVGS |
| 197 | KS12D-197 | VVVGADGVGT |
| 198 | KS12D-198 | VVVGADGVGV |
| 199 | KS12D-199 | VVVGADGVGW |
| 200 | KS12D-200 | VVVGADGVGY |

Supplementary Table 5.TCR recognition motifs

| TCR Name         | TCR recognition motif                                                                                                                         |
|------------------|-----------------------------------------------------------------------------------------------------------------------------------------------|
| TCR1             | [ACDEFGHIKLMNPQRSTVWY]-[ACDEFGHILMNPRSTV]-[ACDEGIKLMNPQRSTV]-[AGSW]-[APS]-[DN]-[ACFGMPQSTV]-[ACEHIKLMNQRSTVWY]-[GN]-[DIKLY]                   |
| TCR1a7           | [ACDEFGHIKLMNPQRSTVWY]-[ACDEFGHIKLMNPQRSTVWY]-[ACDEFGHIKLMNPQRSTV]-[ACDGPRSW]-[AKPQRS]-[DIN]-[CFGPQS]-[ACEHIKLMNQRSTVWY]-[AGLN]-[DEFHIKLNQRY] |
| TCR1a7 (hTCR KO) | [ACDEFGHIKLMNPQRSTVWY]-[ACDEFGHIKLMNPQRSTVW]-[ACDEFGHIKLMNPQRSTV]-[ACDGPSW]-[APRS]-[DN]-[ACFGPQSV]-[ACDEHIKLMNQRSTVWY]-[AGN]-[DEFHIKLNQRY]    |

Supplementary Table 6. Homologous peptides and minigene-clusters for TCR1

| ID | Uniprot ID | Protein Name | Peptide Sequence | 30-mer Minigene Sequence          | Minigene-Cluster ID | Minigene-Cluster Sequence                                                                                                                                                                                                                                                                                                                                              |
|----|------------|--------------|------------------|-----------------------------------|---------------------|------------------------------------------------------------------------------------------------------------------------------------------------------------------------------------------------------------------------------------------------------------------------------------------------------------------------------------------------------------------------|
| 1  | Q96M86     | DNHD1        | TVLGPNGVGK       | LLALEEVACGTVLGPNGVGKRAIVNSLAQA    | TCR1_MC-1           | LLALEEVACGTVLGPNGVGKRAIVNSLAQATPGP<br>AAYMLPMVMGPNVTGKASQPSFSIKGASVMTDE<br>YLYSGTASDFLGKDTAFTRSLGPKLEVANLLQK<br>SASPDAAAGKSGLTPLHVAIKQYLSHILEQRTSS<br>NVINKRENLEKKNKNEAFESVFNKVPVAPD<br>SIGKDGKEQDLYKRSSNDLSNSVSSDGYGKRG<br>QMKPSIESQIIGPFQRTAIIIGPNSGKSNLMDAISF<br>FVQVDFQHAGNYSCVASNVQGHSTSMFFRVV<br>PDEPGSAALGSGSSDPENKDRPLFCISDILLN<br>KHIDAYKTFPPTEPKDKKKKKADET   |
| 2  | Q96PU9     | CMA1A        | MVMGPNVTGK       | TPGPAAYMLPMVMGPNVTGKASQPSFSIKG    |                     |                                                                                                                                                                                                                                                                                                                                                                        |
| 3  | Q95025     | SEM3D        | SGTASDFLGK       | ASVMTDEYLYSGTASDFLGKDTAFTRSLGP    |                     |                                                                                                                                                                                                                                                                                                                                                                        |
| 4  | Q12955     | ANK3         | KSASPDAAAGK      | KLEVANLLQKSASPDAAAGKSGLTPLHVAA    |                     |                                                                                                                                                                                                                                                                                                                                                                        |
| 5  | Q5TEA6     | SE1L2        | QRTSSNVINK       | IKQYLSHILEQRTSSNVINKRENLEKKN      |                     |                                                                                                                                                                                                                                                                                                                                                                        |
| 6  | Q92968     | PEX13        | VPVAPDSIGK       | EAFESVFNKVPVAPDSIGKDGKEQDQL       |                     |                                                                                                                                                                                                                                                                                                                                                                        |
| 7  | P25054     | APC          | SVSSSDGYGK       | YKRSSNDLSNSVSSDGYGKRGQMKPSIES     |                     |                                                                                                                                                                                                                                                                                                                                                                        |
| 8  | Q14683     | SMC1A        | AIIGPNSGSK       | QIIGPFQRTAIIIGPNSGKSNLMDAISFV     |                     |                                                                                                                                                                                                                                                                                                                                                                        |
| 9  | P07333     | CSF1R        | SCVASNVQGH       | QVDFQHAGNYSCVASNVQGHSTSMFFRVV     |                     |                                                                                                                                                                                                                                                                                                                                                                        |
| 10 | Q9C0D6     | FHDC1        | SVGSSDPENK       | PDEPGSAALGSGSSDPENKDRPLFCISD      |                     |                                                                                                                                                                                                                                                                                                                                                                        |
| 11 | Q53EP0     | FND3B        | RLTASNTEGK       | NLKRSTQYKFRLTASNTEGKSCPSEVLVCT    | TCR1_MC-2           | NLKRSTQYKFRLTASNTEGKSCPSEVLVCTIRLH<br>QELGRQKSLWADVHGKLRSHIDALREMSLKLQA<br>SNVTNKNPKSINSRVFIGNLNTEVLDASVKEVG<br>SSSSDVSQKESVPEEPLRNSVGPASVIVISA<br>DPENKEVEEERIAGTTMIGVAVDTVGILGNSVEG<br>KQVLQKTGTRFTYVTEGNSFLIITGNMSSGKSTYL<br>KQIALCEFGIDLDTRVALVGPNGAGKSTLLKLLTG<br>ETFTLRPGEVTVLGPNGSGKSTVAALLQNLCEC<br>GGDKGRVKVITGNSSGKSYLQVGLIILLNKHID<br>AYKTFPPTEPKDKKKKKADET |
| 12 | Q8TDR4     | TCP1L        | KSLWADVHGK       | IRLHQELGRQKSLWADVHGKLRSHIDALRE    |                     |                                                                                                                                                                                                                                                                                                                                                                        |
| 13 | Q9UKM9     | RALY         | KLQASNVTNK       | MSLKLQASNVTNKNDPKSINSRVFIGNLN     |                     |                                                                                                                                                                                                                                                                                                                                                                        |
| 14 | Q5T5Y3     | CAMP1        | GSSSDVSGK        | EVLDAVKEVGSSSDVSQKESVPEEPLR       |                     |                                                                                                                                                                                                                                                                                                                                                                        |
| 15 | Q99650     | OSMR         | IVISADPENK       | NSVGPASVIVISADPENKEVEEERIAGT      |                     |                                                                                                                                                                                                                                                                                                                                                                        |
| 16 | Q16401     | PSMD5        | GILGNSVEGK       | TMIGVAVDTVGILGNSVEGKQVLQKTGTRF    |                     |                                                                                                                                                                                                                                                                                                                                                                        |
| 17 | O15457     | MSH4         | IITGNMSSGK       | TYVTEGNSFLIITGNMSSGKSTYLKQIALC    |                     |                                                                                                                                                                                                                                                                                                                                                                        |
| 18 | Q9UG63     | ABC2         | ALVGPNGAGK       | EFGIDLDTRVALVGPNGAGKSTLLKLLTGE    |                     |                                                                                                                                                                                                                                                                                                                                                                        |
| 19 | Q03518     | TAP1         | ALVGPNGSGK       | TFTLRPGEVTVLGPNGSGKSTVAALLQNL     |                     |                                                                                                                                                                                                                                                                                                                                                                        |
| 20 | Q43196     | MSH5         | VITGNSSGK        | ECGGDKGRVKVITGNSSGKSYLQVGLI       |                     |                                                                                                                                                                                                                                                                                                                                                                        |
| 21 | Q60264     | SMCA5        | ASGGSNSNNK       | SAPSKPAASIASGGSNSNNKGGPEGVAAQANLN | TCR1_MC-3           | SAPSKPAASIASGGSNSNNKGGPEGVAAQANLN<br>FYEGHITSLGPNAGKTTTISMLTGLYTDLNYSI<br>NNLSISANVENKSYLYVGLVAHHNIGSPYCLRL<br>ASADVNGKIIWVDAAGVENLLDEVMKSLSVSS<br>DFLGKDKPVCGLARVNSRASPNLIGATGANS<br>GKVMPTKSPPPPVEEVKKNHSIILSAPNPEGKI<br>ELEDLNKRAAWSPYEDAVPAANARGKSKAKAK<br>APAPFETLNLGNENTDSSANMLGKTQSRLLIWTK<br>SEDEVVLLKFLSFGSDVQNKLESAQCVGDILLN<br>KHIDAYKTFPPTEPKDKKKKKADET    |
| 22 | Q86UK0     | ABCAC        | SLLGPNAGK        | NLNFYEGHITSLGPNAGKTTTISMLTGL      |                     |                                                                                                                                                                                                                                                                                                                                                                        |
| 23 | Q6NVV3     | NIP3         | LSISANVENK       | YTDLNYSINLNSISANVENKSYLYVGLVA     |                     |                                                                                                                                                                                                                                                                                                                                                                        |
| 24 | Q9BZH6     | WDR11        | RLASADVNGK       | HHNIGSPYCLRLASADVNGKIIWVDAAGV     |                     |                                                                                                                                                                                                                                                                                                                                                                        |
| 25 | Q3V6T2     | GRDN         | LSVSSDFLGK       | ENLLDEVMKSLSVSSDFLGKDKPVCGLAR     |                     |                                                                                                                                                                                                                                                                                                                                                                        |
| 26 | Q02078     | MEF2A        | GATGANSGLK       | VNSRASPNLIGATGANSGLKVMPTKSPPPP    |                     |                                                                                                                                                                                                                                                                                                                                                                        |
| 27 | P32856     | STX2         | ILSAPNPEGK       | VEEVKKNHSIILSAPNPEGKIIELEDLNK     |                     |                                                                                                                                                                                                                                                                                                                                                                        |
| 28 | Q8NEG4     | FA83F        | AVPAANARGK       | LRAAWSPYEDAVPAANARGKSKAKAKAPAP    |                     |                                                                                                                                                                                                                                                                                                                                                                        |
| 29 | Q92628     | K0232        | TDSSANMLGK       | FETLNLGNENTDSSANMLGKTQSRLLIWTK    |                     |                                                                                                                                                                                                                                                                                                                                                                        |
| 30 | Q9Y5X2     | SNX8         | SFSGSDVQNK       | SEDEVVLLKFLSFGSDVQNKLESAQCVGD     |                     |                                                                                                                                                                                                                                                                                                                                                                        |
| 31 | Q9H3R2     | MUC13        | RSSSNFLNY        | TVTEKINKAIRSSSNFLNYDLTLRCDYYG     | TCR1_MC-4           | TVTEKINKAIRSSSNFLNYDLTLRCDYYG<br>GAILSSNIVGNSNYGKRNAVEVLKREDFGIDMDS<br>RICIVGPNVGVKSTLLLLTGKCVRSVNTGRSCV<br>LGSNAENKPIKNQLGLTLDLNLNATEGNLSPGN<br>VKNKSSPCEDMGIAATAARRHTVLEGPDGIG<br>KTTLLRQVMDLQIITFFSPLTILVGPNGAGKTTIEC<br>LKYYAAHLVDSGNYTCMASNSIGKSNLVISLHVQ<br>QVIGPFRFTCIIGPNSGKSNVMDALSFVFLQV<br>KVIRAEGMAADVTKGSDPFCVVELNILLNKHIDA<br>YKTFPPTEPKDKKKKKADET       |
| 32 | P10997     | IAPP         | TNVGSNTYK        | SNNFGAILSSNIVGNSNYGKRNAVEVLKRE    |                     |                                                                                                                                                                                                                                                                                                                                                                        |
| 33 | Q8NE71     | ABC1         | CIVGPNVGVK       | DFGIDMDSRICIVGPNVGVKSTLLLLTGK     |                     |                                                                                                                                                                                                                                                                                                                                                                        |
| 34 | Q8N9Z0     | ZN610        | CVLGSNAENK       | CVRSVNTGRSCVLSNAENKPIKNQLGLTL     |                     |                                                                                                                                                                                                                                                                                                                                                                        |
| 35 | P33032     | MC5R         | NLSGPNVKNK       | LDLNLNATEGNLSPGNVKNKSSPCEDMGIA    |                     |                                                                                                                                                                                                                                                                                                                                                                        |
| 36 | Q7RTR0     | NLRP9        | VLEGPDGIGK       | YTAARRHTVLEGPDGIGKTTLLRQVMDL      |                     |                                                                                                                                                                                                                                                                                                                                                                        |
| 37 | Q92878     | RAD50        | ILVGPNGAGK       | QIITFFSPLTILVGPNGAGKTTIECLKYI     |                     |                                                                                                                                                                                                                                                                                                                                                                        |
| 38 | A6NDA9     | LRIT2        | TCMASNSIGK       | AAHLVDSGNYTCMASNSIGKSNLVISLHVQ    |                     |                                                                                                                                                                                                                                                                                                                                                                        |
| 39 | Q8NDV3     | SMC1B        | CIIGPNSGSK       | QVIGPFRFTCIIGPNSGKSNVMDALSFV      |                     |                                                                                                                                                                                                                                                                                                                                                                        |
| 40 | Q6DN14     | MCTP1        | GLMAADVTKG       | FLQVKVIRAEGMAADVTKGSDPFCVVELN     |                     |                                                                                                                                                                                                                                                                                                                                                                        |
| 41 | Q8NCS7     | CTL5         | LGIAANGINK       | GNGGTRSVVVELGIAANGINKLLDAKSLGLK   | TCR1_MC-5           | GNGGTRSVVVELGIAANGINKLLDAKSLGLKALQ<br>DSNRGVRLKAADALGKLSIHIKVDPSFCVQEGEI<br>LGLLGPNGAGKSSSIRMISGIEGESVTEIDISFLES<br>PNPENKDYEEPKNVKGALAGLGGPLGVPVGPDP<br>GKGLDFPEGVFAVSLDAKLLLQRRAAADSAG<br>KNGLTPLHVAIFWLNAAETWVDISSNTAGKTLF<br>GKMMDYLRQHSDSGNVYTCIASNMEGKAQKYY<br>FLSIQILLNKHIDAYKTFPPTEPKDKKKKKADET                                                                |
| 42 | Q92616     | GCN1         | RLKAADALGK       | KALQDSNRGVRLKAADALGKLSIHIKVD      |                     |                                                                                                                                                                                                                                                                                                                                                                        |
| 43 | Q8N139     | ABCA6        | GLLGPNAGK        | SFCVQEGEILGLLGPNAGKSSSIRMISGI     |                     |                                                                                                                                                                                                                                                                                                                                                                        |
| 44 | Q9UBV2     | SE1L1        | FLESPNPENK       | EGESVTEIDISFLESPNPENKDYEEPKNVVK   |                     |                                                                                                                                                                                                                                                                                                                                                                        |
| 45 | Q14526     | HIC1         | GVPGPDGKGGK      | GALAGLGGPLGVPGPDGKGLDFPEGVFAV     |                     |                                                                                                                                                                                                                                                                                                                                                                        |
| 46 | Q01484     | ANK2         | RRAAADSAGK       | SLDVAKLLLQRRAAADSAGKNGLTPLHVAA    |                     |                                                                                                                                                                                                                                                                                                                                                                        |
| 47 | Q14697     | GANAB        | VDISSNTAGK       | IFWLNAAETWVDISSNTAGKTLFGKMMDYL    |                     |                                                                                                                                                                                                                                                                                                                                                                        |
| 48 | Q96RW7     | HMCN1        | TCIASNMEGK       | RSQHSDSGNVYTCIASNMEGKAQKYYFLSIQ   |                     |                                                                                                                                                                                                                                                                                                                                                                        |



Supplementary Table 7. The IMGT numbering scheme for TCR1's CDRs

| CDR Region  | IMGT number | AA. | TCR Libraries |                             |                           |
|-------------|-------------|-----|---------------|-----------------------------|---------------------------|
| TCR1 CDR-3B | 105         | A   |               |                             |                           |
|             | 106         | S   |               |                             |                           |
|             | 107         | S   |               |                             |                           |
|             | 108         | V   |               |                             |                           |
|             | 109         | G   |               |                             |                           |
|             | 110         | P   |               |                             |                           |
|             | 111         | G   |               | TCR1 Lib1<br>(G111 to N113) |                           |
|             | 112.1       | Q   |               |                             |                           |
|             | 112         | N   |               |                             |                           |
|             | 113         | N   |               |                             |                           |
|             | 114         | S   |               |                             |                           |
|             | 115         | P   |               |                             |                           |
|             | 116         | L   |               |                             |                           |
|             | 117         | H   |               |                             |                           |
| TCR1 CDR-1A | 27          | T   |               |                             |                           |
|             | 28          | R   |               |                             |                           |
|             | 29          | D   |               |                             | TCR1 Lib2<br>(D29 to T36) |
|             | 30          | T   |               |                             |                           |
|             | 36          | T   |               |                             |                           |
|             | 37          | Y   |               |                             |                           |
|             | 38          | Y   |               |                             |                           |

Note: AA., amino acid. The IMGT numbers, which are standardized identifiers for immunogenetics data, were acquired through detailed analysis using the International ImMunoGeneTics information system (IMGT) database available at <https://www.imgt.org/>.

Supplementary Table 8. The information of 24 TCR clones derived from TCR libraries

| ID | TCR Name      | CDR sequence            | Count | TCR Libraries |
|----|---------------|-------------------------|-------|---------------|
| 1  | TCR1b1        | ASSVGP <u>AOHS</u> SPLH | 20    | TCR1 Lib1     |
| 2  | TCR1b2        | ASSVGP <u>REHS</u> SPLH | 16    |               |
| 3  | TCR1b3        | ASSVGP <u>AEHS</u> SPLH | 4     |               |
| 4  | TCR1b4        | ASSVGP <u>AEHS</u> SPLH | 4     |               |
| 5  | TCR1b5        | ASSVGP <u>ARHN</u> SPLH | 4     |               |
| 6  | TCR1b6        | ASSVGP <u>AEHQ</u> SPLH | 3     |               |
| 7  | TCR1b7        | ASSVGP <u>GEHS</u> SPLH | 2     |               |
| 8  | TCR1b8        | ASSVGP <u>GHWS</u> SPLH | 2     |               |
| 9  | TCR1b9        | ASSVGP <u>GYHA</u> SPLH | 2     |               |
| 10 | TCR1b10       | ASSVGP <u>RRHS</u> SPLH | 2     |               |
| 11 | TCR1b11       | ASSVGP <u>SEHS</u> SPLH | 2     |               |
| 12 | <b>TCR1a1</b> | TR <u>LCL</u> YY        | 4     | TCR1 Lib2     |
| 13 | TCR1a2        | TR <u>MLL</u> YY        | 4     |               |
| 14 | TCR1a3        | TR <u>NSL</u> YY        | 4     |               |
| 15 | TCR1a4        | TR <u>FDP</u> YY        | 3     |               |
| 16 | TCR1a5        | TR <u>LSP</u> YY        | 3     |               |
| 17 | TCR1a6        | TR <u>LSY</u> YY        | 3     |               |
| 18 | <b>TCR1a7</b> | TR <u>MFL</u> YY        | 3     |               |
| 19 | TCR1a8        | TR <u>FFF</u> YY        | 2     |               |
| 20 | TCR1a9        | TR <u>INF</u> YY        | 2     |               |
| 21 | TCR1a10       | TR <u>LHL</u> YY        | 2     |               |
| 22 | TCR1a11       | TR <u>HS</u> AYY        | 2     |               |
| 23 | TCR1a12       | TR <u>IQT</u> YY        | 2     |               |
| 24 | TCR1a13       | TR <u>RND</u> YY        | 2     |               |

Note: This table summarizes the cloning and sequencing process of TCRs from single-cell sorted TCR Jurkat cells, analyzing CDR sequences from 100 samples in each library. 24 Clones that were identified at least twice were used for further validation.

Supplementary Table 9. Functional evaluation process of 24 TCR clones from TCR libraries

|           |                                           | 1                  | 2      | 3      | 4      | 5      | 6      | 7      | 8      | 9      | 10      | 11      | 12                 | 13     | 14     | 15     | 16     | 17     | 18     | 19     | 20     | 21      | 22      | 23      | 24      |
|-----------|-------------------------------------------|--------------------|--------|--------|--------|--------|--------|--------|--------|--------|---------|---------|--------------------|--------|--------|--------|--------|--------|--------|--------|--------|---------|---------|---------|---------|
|           |                                           | TCR1 Lib1 (CDR-3B) |        |        |        |        |        |        |        |        |         |         | TCR1 Lib2 (CDR-1A) |        |        |        |        |        |        |        |        |         |         |         |         |
|           |                                           | TCR1b1             | TCR1b2 | TCR1b3 | TCR1b4 | TCR1b5 | TCR1b6 | TCR1b7 | TCR1b8 | TCR1b9 | TCR1b10 | TCR1b11 | TCR1a1             | TCR1a2 | TCR1a3 | TCR1a4 | TCR1a5 | TCR1a6 | TCR1a7 | TCR1a8 | TCR1a9 | TCR1a10 | TCR1a11 | TCR1a12 | TCR1a13 |
| Filter_01 | Functional avidity (EC50)                 | Pass               | Pass   | Pass   | Pass   | Pass   | Pass   | Pass   | Pass   | Pass   | Pass    | Pass    | Pass               | Stop   | Pass   | Pass   | Stop   | Pass   | Pass   | Pass   | Pass   | Pass    | Pass    | Pass    | Pass    |
| Filter_02 | SMC1A <sub>29-38</sub> Tetramer binding   | Stop               | Pass   | Stop   | Pass   | Pass   | Pass   | Stop   | Stop   | Stop   | Pass    | Pass    | Pass               |        | Pass   | Pass   |        | Pass   | Pass   | Pass   | Pass   | Pass    | Pass    | Pass    | Pass    |
| Filter_03 | SMC1A <sub>29-38</sub> recognition        |                    | Stop   |        | Stop   | Stop   | Pass   |        |        |        | Stop    | Pass    | Pass               |        | Pass   | Stop   |        | Pass   | Pass   | Pass   | Pass   | Pass    | Pass    | Pass    | Pass    |
| Filter_04 | HLA-A*11:01 <sup>*</sup> K562 recognition |                    |        |        |        |        | Pass   |        |        |        |         | Pass    | Pass               |        | Pass   |        |        | Stop   | Pass   | Stop   | Stop   | Pass    | Pass    | Pass    | Pass    |
| Filter_05 | X-scan assay                              |                    |        |        |        | Stop   |        |        |        |        | Stop    | Pass    |                    |        | Stop   |        |        |        | Pass   |        |        | Stop    | Stop    | Stop    | Stop    |

Supplementary Table 10. Homologous peptides for TCR1a7 T cells

| ID | Uniprot ID | Protein Name | Peptide Sequence |
|----|------------|--------------|------------------|
| 1  | Q9Y6R7     | FCGBP        | AAAPSNCSGR       |
| 2  | Q9Y603     | ETV7         | RVVDPNGLAR       |
| 3  | Q9Y5F6     | PCDGM        | LQVSSDGTLK       |
| 4  | Q9Y3F4     | STRAP        | ATAAADFTAK       |
| 5  | Q9Y366     | IFT52        | RSNWKIQSLK       |
| 6  | Q9Y305     | ACOT9        | VMVARDSENK       |
| 7  | Q9Y2M0     | FAN1         | MLFSPDFTLR       |
| 8  | Q9Y2K5     | R3HD2        | MSGAKIQWLK       |
| 9  | Q9Y2B5     | VP9D1        | KLLPQNPEAK       |
| 10 | Q9Y275     | TN13B        | GNSSQNSRNK       |
| 11 | Q9Y238     | DLEC1        | AVGCPISLR        |
| 12 | Q9Y217     | MTMR6        | VMDAAIFLAK       |
| 13 | Q9UQC9     | CLCA2        | SIAGPICNLK       |
| 14 | Q9UQ53     | MGT4B        | SLAGKIQKLLK      |
| 15 | Q9UQ35     | SRRM2        | SDSSPDSKAK       |
| 16 | Q9UQ35     | SRRM2        | FESSPDPELK       |
| 17 | Q9UQ05     | KCNH4        | LGADPNFVLK       |
| 18 | Q9UPN3     | MACF1        | IKTSQIFLAK       |
| 19 | Q9UP65     | PA24C        | GSTWAISSLY       |
| 20 | Q9UNY4     | TTF2         | KVEPSDPVAR       |
| 21 | Q9ULN7     | PNM8B        | YTDPSDPWAR       |
| 22 | Q9ULM3     | YETS2        | TTNSKNPSGK       |
| 23 | Q9ULL5     | PRR12        | GVGPPNSEGK       |
| 24 | Q9ULI4     | KI26A        | ASFDSDCSLR       |
| 25 | Q9UKZ4     | TEN1         | LTISSNGVLK       |
| 26 | Q9UKY1     | ZHX1         | RYAWKNGNLK       |
| 27 | Q9UK73     | FEM1B        | IIAARNGHAK       |
| 28 | Q9UK05     | GDF2         | TKLSPISVLY       |
| 29 | Q9UJ71     | CLC4K        | TLNAQIPELK       |
| 30 | Q9UHW9     | S12A6        | LVKDRNSMLR       |
| 31 | Q9UHV7     | MED13        | ATVPSIPEAH       |
| 32 | Q9UG63     | ABCF2        | ALVGPNAGAGK      |
| 33 | Q9UF33     | EPHA6        | RIVSSIQTLR       |
| 34 | Q9UBZ9     | REV1         | HTPSSNGALK       |
| 35 | Q9UBZ9     | REV1         | ASVPKNPLLH       |
| 36 | Q9UBV2     | SE1L1        | FLESPNPENK       |
| 37 | Q9UBS9     | SUCO         | KILANPEAK        |
| 38 | Q9UBL0     | ARP21        | SSTSDSSNR        |

|    |        |       |            |
|----|--------|-------|------------|
| 39 | Q9UBF8 | PI4KB | SVPARIPENR |
| 40 | Q9P2K3 | RCOR3 | VQTSKIGLGR |
| 41 | Q9P2J2 | TUTLA | GSGSPDSVAK |
| 42 | Q9P2I0 | CPSF2 | AAFDKIQQLK |
| 43 | Q9P2E3 | ZNFX1 | SLVRSNQEGK |
| 44 | Q9P267 | MBD5  | RRVDQNGVLY |
| 45 | Q9NZV7 | ZIM2  | SKQSKDPLGK |
| 46 | Q9NZU1 | FLRT1 | RTIARDSLAR |
| 47 | Q9NZJ4 | SACS  | IIHDANSRLK |
| 48 | Q9NYV4 | CDK12 | SVTAAIPHLK |
| 49 | Q9NYL2 | M3K20 | VVIAADGVLK |
| 50 | Q9NY47 | CA2D2 | FIEDPNFKNK |
| 51 | Q9NXD2 | MTMRA | KVLGPNQKLK |
| 52 | Q9NX70 | MED29 | VIKAQISCAK |
| 53 | Q9NVX2 | NLE1  | VSGSSDSTLK |
| 54 | Q9NVT9 | ARMC1 | RDLAADPLNR |
| 55 | Q9NRX2 | RM17  | SVAAAISHGR |
| 56 | Q9NRC6 | SPTN5 | SWTDSISLAR |
| 57 | Q9NR48 | ASH1L | LTAAPIGLGY |
| 58 | Q9NR23 | GDF3  | TKLSPISMLY |
| 59 | Q9NQS1 | AVEN  | GGRGPIFELK |
| 60 | Q9NPG3 | UBN1  | LSFSADSSAK |
| 61 | Q9HCK5 | AGO4  | MVGGPDPYLK |
| 62 | Q9HC52 | CBX8  | SLIARIPVAR |
| 63 | Q9HC21 | TPC   | RLSRSDPSAK |
| 64 | Q9HAR2 | AGRL3 | STESSIGSGK |
| 65 | Q9HAP2 | MLXIP | PSTAQDPLGK |
| 66 | Q9H6S3 | ES8L2 | SLGRSDGVAK |
| 67 | Q9H582 | ZN644 | TTFPKNSALK |
| 68 | Q9H3R2 | MUC13 | RSSSNFLNY  |
| 69 | Q9H2U9 | ADAM7 | GIADPNQSAK |
| 70 | Q9H2K2 | TNKS2 | LAHGADPTLK |
| 71 | Q9H269 | VPS16 | ATADKIQRAR |
| 72 | Q9H223 | EHD4  | ALEDADFENK |
| 73 | Q9H1A4 | APC1  | SILSKDGVLY |
| 74 | Q9H0G5 | NSRP1 | KESSPNSRAK |
| 75 | Q9H0E3 | SP130 | ISEARDSMLK |
| 76 | Q9H095 | DRC9  | KVDSKDSKGK |
| 77 | Q9C0F0 | ASXL3 | RQMGSDGILR |
| 78 | Q9C0D6 | FHDC1 | SVGSSDPENK |

|     |        |       |             |
|-----|--------|-------|-------------|
| 79  | Q9BZE1 | RM37  | AWVDSDQLLY  |
| 80  | Q9BZC7 | ABCA2 | RCLGSIQHLK  |
| 81  | Q9BYG4 | PAR6G | AVSSANPLLR  |
| 82  | Q9BXW9 | FACD2 | LRLDPNFKLK  |
| 83  | Q9BXP5 | SRRT  | SLPSQNPILK  |
| 84  | Q9BXI3 | 5NT1A | GGNSPICYLK  |
| 85  | Q9BXA6 | TSSK6 | RRAPPDFVNK  |
| 86  | Q9BX40 | LS14B | AGFPSIPVGK  |
| 87  | Q9BTD3 | TM121 | SRVSAIFVGK  |
| 88  | Q9BTA9 | WAC   | TVVPQNSSAR  |
| 89  | Q9BSJ8 | ESYT1 | SSSGPNSRLY  |
| 90  | Q9BQI7 | PSD2  | LNSASDPSLK  |
| 91  | Q99973 | TEP1  | VSVSRDGTLLK |
| 92  | Q99942 | RNF5  | SQKPQDPRLK  |
| 93  | Q99941 | ATF6B | LLLPAISHNK  |
| 94  | Q99698 | LYST  | MSTDSNSLAR  |
| 95  | Q99677 | LPAR4 | ATLSQIGTNK  |
| 96  | Q99650 | OSMR  | IVISADPENK  |
| 97  | Q99551 | MTEF1 | VLDSSISTLK  |
| 98  | Q99424 | ACOX2 | RLRPSDPEAK  |
| 99  | Q99259 | DCE1  | KIIPADFEAK  |
| 100 | Q96RR4 | KKCC2 | SETRKIFSGK  |
| 101 | Q96RN5 | MED15 | IPSSSIPLGR  |
| 102 | Q96RL6 | SIG11 | STLGPISQGH  |
| 103 | Q96RK4 | BBS4  | KYVAAISCLK  |
| 104 | Q96QV1 | HHIP  | TILCSDSNGK  |
| 105 | Q96Q89 | KI20B | YVFSADPIAR  |
| 106 | Q96Q15 | SMG1  | KVVDRIFSLY  |
| 107 | Q96Q05 | TPPC9 | GICWRIPSLK  |
| 108 | Q96PN7 | TREF1 | KARGAIPSGK  |
| 109 | Q96P66 | GP101 | RMEAKDGSLK  |
| 110 | Q96P26 | 5NT1B | GGKDPIGYLK  |
| 111 | Q96NW7 | LRRC7 | QLPDSIGLLK  |
| 112 | Q96NW7 | LRRC7 | VLPGSIGKLLK |
| 113 | Q96N23 | CFA54 | KITCRNFIGK  |
| 114 | Q96N11 | INT15 | LVPGSIQTLK  |
| 115 | Q96MR9 | ZN560 | TSSGRIQHLR  |
| 116 | Q96M86 | DNHD1 | TVLGPNGVGK  |
| 117 | Q96L91 | EP400 | ATFSANPEAK  |
| 118 | Q96KR4 | LMLN  | GISDADFVLY  |

|     |        |       |             |
|-----|--------|-------|-------------|
| 119 | Q96K78 | AGRG7 | FTFARIPVGR  |
| 120 | Q96JM4 | LRIQ1 | ETNWRDSSLK  |
| 121 | Q96JB1 | DYH8  | STAPKDPKLY  |
| 122 | Q96HA8 | NTAQ1 | RVIRADSYLK  |
| 123 | Q96H86 | ZN764 | QTDPADSRNK  |
| 124 | Q96DU9 | PABP5 | SSFGSISRAK  |
| 125 | Q96CV9 | OPTN  | RTSDSDQQAY  |
| 126 | Q96CM8 | ACSF2 | ILASPIFNGK  |
| 127 | Q96BY9 | SARAF | RRLDPIPQLK  |
| 128 | Q96B01 | R51A1 | SVKSPNQSLR  |
| 129 | Q96AY4 | TTC28 | AVDPQNCILY  |
| 130 | Q96AH8 | RAB7B | IIVGAIGVGK  |
| 131 | Q93070 | NAR4  | YLTSAIQLLR  |
| 132 | Q93052 | LPP   | IPVAPIGTLK  |
| 133 | Q93009 | UBP7  | KTDPKDPANY  |
| 134 | Q92993 | KAT5  | SVFPQNGAAR  |
| 135 | Q92968 | PEX13 | VPVAPDSIGK  |
| 136 | Q92887 | MRP2  | KVLGPNGLLK  |
| 137 | Q92878 | RAD50 | ILVGPNGAGK  |
| 138 | Q92636 | FAN   | FTTSQDSTLK  |
| 139 | Q92625 | ANS1A | RSSDQDSTNK  |
| 140 | Q92598 | HS105 | AKIAADFRNK  |
| 141 | Q92583 | CCL17 | RAICSDPNNK  |
| 142 | Q92547 | TOPB1 | ESAPSNGSGK  |
| 143 | Q92529 | SHC3  | AYVAKDPVNR  |
| 144 | Q8WZ42 | TITIN | TTVSSDSVAK  |
| 145 | Q8WZ42 | TITIN | PVFAKDPIAK  |
| 146 | Q8WXH0 | SYNE2 | GLQAKIQEAK  |
| 147 | Q8WX94 | NALP7 | SLFSSNSNLK  |
| 148 | Q8WVF1 | OSCP1 | ESIAPNPLAK  |
| 149 | Q8WUY9 | DEP1B | RMMARICLNK  |
| 150 | Q8WU76 | SCFD2 | AVGGPDCHLR  |
| 151 | Q8TDJ6 | DMXL2 | FSCGADGTLK  |
| 152 | Q8TD55 | PKHO2 | ASAASDGLLR  |
| 153 | Q8TCB0 | IFI44 | LLLGPIGAGK  |
| 154 | Q8TC44 | POC1B | ITASSDGTLLK |
| 155 | Q8TC21 | ZN596 | KTFKNSNLR   |
| 156 | Q8TBC3 | SHKB1 | LLSGRISTLK  |
| 157 | Q8TB96 | TIP   | TTVDANGYLK  |
| 158 | Q8TAT5 | NEIL3 | RVVGKDGENTK |

|     |        |       |            |
|-----|--------|-------|------------|
| 159 | Q8TAC1 | RFESD | SINPKDPSAK |
| 160 | Q8NI35 | INADL | SVADRDQRLK |
| 161 | Q8NHV4 | NEDD1 | KIADSIGNNR |
| 162 | Q8NHM5 | KDM2B | KKVPPDGLLR |
| 163 | Q8NG31 | KNL1  | NSSAPICENK |
| 164 | Q8NFD5 | ARI1B | IAHWQDSLAK |
| 165 | Q8NEZ4 | KMT2C | SVTPKIGMGK |
| 166 | Q8NEY8 | PPHLN | RSHPSDGYNR |
| 167 | Q8NE71 | ABCF1 | CIVGPNGVGK |
| 168 | Q8NDY3 | ARHL1 | RKISKDSENK |
| 169 | Q8NDV3 | SMC1B | CIIGPNGSGK |
| 170 | Q8NCS7 | CTL5  | LGIAANGINK |
| 171 | Q8NBT0 | POC1A | ITASSDSTLK |
| 172 | Q8NBP0 | TTC13 | EVAGKIPKGK |
| 173 | Q8NBF6 | AVL9  | KDFSQISILK |
| 174 | Q8N7X1 | RMXL3 | RSLDANSSGR |
| 175 | Q8N6F1 | CLD19 | RVGDSNPIAK |
| 176 | Q8N5U6 | RNF10 | FIEAAIQELK |
| 177 | Q8N4H0 | SPA6L | KQGDADFHGK |
| 178 | Q8N456 | LRC18 | NLISPNSMAK |
| 179 | Q8N3U4 | STAG2 | RQIDKIQCAK |
| 180 | Q8N3K9 | CMYA5 | SSARSDQMLK |
| 181 | Q8N371 | KDM8  | QLFDQIPELK |
| 182 | Q8N2K0 | ABD12 | AALDADCRLK |
| 183 | Q8N2C9 | UMAS1 | MVLGAISLLY |
| 184 | Q8N1W1 | ARG28 | CSSPKISLGK |
| 185 | Q8N1G2 | CMTR1 | FTNPRDSYGK |
| 186 | Q8N139 | ABCA6 | GLLGPNGAGK |
| 187 | Q8N136 | DAW1  | ATASADGTAR |
| 188 | Q8N122 | RPTOR | RLDDQIFLNR |
| 189 | Q8IZL2 | MAML2 | KIAPQDQINR |
| 190 | Q8IZH2 | XRN1  | RFTGSIFIGR |
| 191 | Q8IYL2 | TRM44 | TRSSRNGSLK |
| 192 | Q8IXK0 | PHC2  | GTAPQNGENK |
| 193 | Q8IXF0 | NPAS3 | GPSASNSLLY |
| 194 | Q8IWX8 | CHERP | CTKDAISAGK |
| 195 | Q8IWW8 | HOT   | YVSAPIGKGK |
| 196 | Q8IWU9 | TPH2  | GLLSSIGELK |
| 197 | Q8IWC1 | MA7D3 | GLPSPISTNR |
| 198 | Q8IVS8 | GLCTK | KVRDRNFQLR |



|     |        |       |             |
|-----|--------|-------|-------------|
| 199 | Q86YW9 | MD12L | NVMPANSNLR  |
| 200 | Q86YA3 | ZGRF1 | SKVWQDGILK  |
| 201 | Q86XM0 | CTSRD | TLFSSIFEAK  |
| 202 | Q86XK2 | FBX11 | IKTDSNPTLR  |
| 203 | Q86XA9 | HTR5A | ALESPNPLLR  |
| 204 | Q86V48 | LUZP1 | GSVPSDPLGR  |
| 205 | Q86UV5 | UBP48 | LLVSANQTLK  |
| 206 | Q86UU0 | BCL9L | QISPSNSSLK  |
| 207 | Q86UK0 | ABCAC | SLLGPNGAGK  |
| 208 | Q86TC9 | MYPN  | TIMAANPQGR  |
| 209 | Q86SR1 | GLT10 | YVSDKISLNR  |
| 210 | Q7Z7K0 | COXM1 | ALDPADQHLLR |
| 211 | Q7Z7G8 | VP13B | KLFAPDPENK  |
| 212 | Q7Z7G8 | VP13B | NAIASIFQAK  |
| 213 | Q7Z745 | MRO2B | RGAGAIGLLK  |
| 214 | Q7Z5Q5 | DPOLN | ITTPKNFKGK  |
| 215 | Q7Z589 | EMSY  | AGNSSIQEGK  |
| 216 | Q7Z4P5 | GDF7  | ARLSPISILY  |
| 217 | Q7Z3Q1 | S46A3 | IGIAPIFILY  |
| 218 | Q7Z3G6 | PRIC2 | RRSAKIGKNK  |
| 219 | Q7Z309 | PBIR2 | SGLSSDPLAK  |
| 220 | Q7Z2Y5 | NRK   | KIQAADPVNR  |
| 221 | Q7Z2K8 | GRIN1 | RTAPPDGAAK  |
| 222 | Q7Z2E3 | APTX  | QLLPSIPQLK  |
| 223 | Q7RTX1 | TS1R1 | AVIGPDSTNR  |
| 224 | Q7RTR2 | NLRC3 | HALCANSTLK  |
| 225 | Q7RTR0 | NLRP9 | VLEGPDGIGK  |
| 226 | Q7LG56 | RIR2B | GSFAAIFWLK  |
| 227 | Q7LDG7 | GRP2  | LSHSSISRLK  |
| 228 | Q7L9B9 | EEPD1 | ESSPSNGHGK  |
| 229 | Q7L1I2 | SV2B  | LLMDRIGRLK  |
| 230 | Q6ZUX3 | TGRM2 | IVIPPIPKAR  |
| 231 | Q6ZUB1 | S31E1 | SRSRKISALK  |
| 232 | Q6ZT07 | TBCD9 | STLPPIPHLH  |
| 233 | Q6ZRQ5 | MMS22 | ATIPPISSLK  |
| 234 | Q6ZNL6 | FGD5  | SEVGPIFHLY  |
| 235 | Q6ZNG1 | ZN600 | KTFGSDSHLK  |
| 236 | Q6ZMI0 | PPR21 | KLRAQNQVLK  |
| 237 | Q6ZMC9 | SIG15 | TCTAANSLGR  |
| 238 | Q6XZF7 | DNMBP | LSVSANQKLLK |

|     |        |       |             |
|-----|--------|-------|-------------|
| 239 | Q6V0I7 | FAT4  | FTVDKNGVLK  |
| 240 | Q6UXT8 | ALKL1 | EIFPRDSNLK  |
| 241 | Q6TFL4 | KLH24 | LLRAAPIAK   |
| 242 | Q6SZW1 | SARM1 | SDIGAIQSLK  |
| 243 | Q6QHC5 | DEGS2 | ALMRPDPRLK  |
| 244 | Q6P474 | PDXD2 | GHTDKIGRLK  |
| 245 | Q6P2Q9 | PRP8  | FMHGKIPTLK  |
| 246 | Q6P1S2 | CC033 | KTTGSDFSLK  |
| 247 | Q6NXN4 | D19P1 | SSPGRIPNLK  |
| 248 | Q6NUT2 | D19L2 | SSPGRIQSLK  |
| 249 | Q6NUN9 | ZN746 | SSACSDGTLK  |
| 250 | Q6NUM9 | RETST | RAQSPIPNLY  |
| 251 | Q6NUJ5 | PWP2B | APSASIPKPK  |
| 252 | Q6IQ21 | ZN770 | KVFPSSISLKL |
| 253 | Q6IMN6 | CAPR2 | STLPKDPVLR  |
| 254 | Q6IMI4 | ST6B1 | KLPGSIFENK  |
| 255 | Q6AHZ1 | Z518A | LLNDKDGTLK  |
| 256 | Q68DU8 | KCD16 | LVCGRISLAK  |
| 257 | Q68DI1 | ZN776 | KLFRSNSHLK  |
| 258 | Q68D10 | SPT2  | SISGSIPAGR  |
| 259 | Q66K14 | TBC9B | SVSPPIPHLR  |
| 260 | Q63HN8 | RN213 | KRISSNPVAK  |
| 261 | Q5VYP0 | S31A3 | LLASPDPQAK  |
| 262 | Q5VU92 | DC121 | GHIARIPLLR  |
| 263 | Q5VU65 | P210L | ASTASIFLAY  |
| 264 | Q5VTB9 | RN220 | LPSSKNSLLK  |
| 265 | Q5T9G4 | ARM12 | CSNSPICIAR  |
| 266 | Q5T5Y3 | CAMP1 | SSGDSISLAR  |
| 267 | Q5T2R2 | DPS1  | FTSCSDQMGK  |
| 268 | Q5T011 | SZT2  | GVSRAIQALR  |
| 269 | Q5SZD4 | GLYL3 | DNTASISLLK  |
| 270 | Q5SYE7 | NHSL1 | SVSPANGKGG  |
| 271 | Q5SRN2 | TSBP1 | KSCSKIQILK  |
| 272 | Q5KSL6 | DGKK  | GTLSSISLKL  |
| 273 | Q5JUQ0 | FA78A | AISDSDGVNY  |
| 274 | Q5HYK9 | ZN667 | KKLPPNQC�K  |
| 275 | Q5H9R4 | ARMX4 | AIHRANSQAK  |
| 276 | Q5H8A4 | PIGG  | QVIAADFCLK  |
| 277 | Q5GH76 | XKR4  | STLRSISNNR  |
| 278 | Q5GH73 | XKR6  | ALFASIFQLY  |

|     |        |       |             |
|-----|--------|-------|-------------|
| 279 | Q5BKT4 | AG10A | HVVCSIGMLR  |
| 280 | Q587J7 | TDR12 | VESSSIFCLK  |
| 281 | Q53HC5 | KLH26 | STADKNGALK  |
| 282 | Q53GS7 | GLE1  | LTNSKDSQAK  |
| 283 | Q53FE4 | CD017 | VKLPPNFTAK  |
| 284 | Q502W7 | CCD38 | ASQGRDSQGK  |
| 285 | Q4V348 | Z658B | KAFAQNSTLR  |
| 286 | Q4LDE5 | SVEP1 | NVTWQIPTAK  |
| 287 | Q4KWH8 | PLCH1 | ATRDQDGVLR  |
| 288 | Q4G0U5 | PCDP1 | SILRKIGQAK  |
| 289 | Q4G0S7 | CC152 | LSVGKDSHLK  |
| 290 | Q49AH0 | CDNF  | KLDSQICELK  |
| 291 | Q495X7 | TRI60 | KSFRRNPQLR  |
| 292 | Q495D7 | CL036 | RIAWRIQRLK  |
| 293 | Q460N5 | PAR14 | LVSDKIPKAK  |
| 294 | Q3V6T2 | GRDN  | SGSSPIQYLK  |
| 295 | Q3V6T2 | GRDN  | LSVSSDFLGK  |
| 296 | Q2TAZ0 | ATG2A | DTMRPDSLLK  |
| 297 | Q2M3X9 | ZN674 | RFFDPNQRGK  |
| 298 | Q1MSJ5 | CSPP1 | VDLDAIPSAK  |
| 299 | Q17R31 | TATD3 | VLIRQIQLAK  |
| 300 | Q16586 | SGCA  | MVASPDSHAR  |
| 301 | Q16288 | NTRK3 | RAFAKNPHLR  |
| 302 | Q15846 | CLUL1 | ILPSSNFTLK  |
| 303 | Q15813 | TBCE  | LIASIGQLK   |
| 304 | Q15517 | CDSN  | AAGPPISEGK  |
| 305 | Q15517 | CDSN  | SSGSSISSAR  |
| 306 | Q15392 | DHC24 | MVPPKISLLK  |
| 307 | Q15388 | TOM20 | RRSDPNFKNR  |
| 308 | Q15276 | RABE1 | EEIASISSLK  |
| 309 | Q15274 | NADC  | ARQAADFTLK  |
| 310 | Q15154 | PCM1  | RSIGSDSQGR  |
| 311 | Q15032 | R3HD1 | SSTDSDSSLR  |
| 312 | Q15020 | SART3 | VQIRPIFSNR  |
| 313 | Q14766 | LTBP1 | CQCPPNFTGK  |
| 314 | Q14696 | MESD  | GSDRAIFMLR  |
| 315 | Q14683 | SMC1A | AIIGPNGSGK  |
| 316 | Q14667 | BLTP2 | SVTRPICRGK  |
| 317 | Q14563 | SEM3A | SGTAADFMGR  |
| 318 | Q14526 | HIC1  | GVPGPDGK GK |

|     |        |       |             |
|-----|--------|-------|-------------|
| 319 | Q14439 | GP176 | YIGSADFQAK  |
| 320 | Q14244 | MAP7  | AVSPSNPKAR  |
| 321 | Q14146 | URB2  | RSEGAIQSLR  |
| 322 | Q14005 | IL16  | SPSAPISTAK  |
| 323 | Q13835 | PKP1  | VYIPPISCNK  |
| 324 | Q13630 | FCL   | KKTASNSKLR  |
| 325 | Q13620 | CUL4B | RVLAKNPKGK  |
| 326 | Q13546 | RIPK1 | VVLWAIKANK  |
| 327 | Q13496 | MTM1  | KRTSRDGVNR  |
| 328 | Q13459 | MYO9B | AITARDSMAK  |
| 329 | Q13136 | LIPA1 | ALEDKNSLLR  |
| 330 | Q13106 | ZN154 | REVGKDFLAK  |
| 331 | Q13087 | PDIA2 | QTSAKIFAAR  |
| 332 | Q13045 | FLII  | GSGPKDPMAR  |
| 333 | Q13042 | CDC16 | SIKSSICLLR  |
| 334 | Q13017 | RHG05 | DVVSPIPANK  |
| 335 | Q12891 | HYAL2 | PTAPPIFTGR  |
| 336 | Q0P6H9 | TMM62 | HVSGPIFVLK  |
| 337 | Q09019 | DMWD  | SKAPRNPLAK  |
| 338 | Q08AH3 | ACS2A | TVTGGKIQRAK |
| 339 | Q07002 | CDK18 | EDTASIFSLK  |
| 340 | Q05519 | SRS11 | QSLAADQLLK  |
| 341 | Q05193 | DYN1  | AQQRSNQMNK  |
| 342 | Q05048 | CSTF1 | LSSGKDSVAK  |
| 343 | Q03518 | TAP1  | ALVGPNGSGK  |
| 344 | Q02880 | TOP2B | VVIPRDSLLR  |
| 345 | Q02363 | ID2   | ELVPSIPQNK  |
| 346 | Q02078 | MEF2A | GATGANSLGK  |
| 347 | Q02045 | MYL5  | KMLDPDGK GK |
| 348 | Q01974 | ROR2  | GQDGPIPTLK  |
| 349 | Q01484 | ANK2  | RRAAADSAGK  |
| 350 | P82094 | TMF1  | EESSEISSLK  |
| 351 | P80192 | M3K9  | RRTPSDGALK  |
| 352 | P78312 | F193A | SINWSNFSLK  |
| 353 | P59045 | NAL11 | SLISPDCVLK  |
| 354 | P58304 | VSX2  | TVSGPDSLAR  |
| 355 | P55087 | AQP4  | VCTRKISIAK  |
| 356 | P55056 | APOC4 | FLESKDSLLK  |
| 357 | P54886 | P5CS  | AASSQDSVGR  |
| 358 | P53396 | ACLY  | TAVAKNQALK  |

|     |        |       |            |
|-----|--------|-------|------------|
| 359 | P53355 | DAPK1 | LLDPPDPLGK |
| 360 | P51816 | AFF2  | NSVPQNPNNK |
| 361 | P50613 | CDK7  | RSEAKDGINR |
| 362 | P50542 | PEX5  | QHTASDFVAK |
| 363 | P49005 | DPOD2 | STQSRDSINK |
| 364 | P48230 | T4S4  | FIISAISINK |
| 365 | P48165 | CXA8  | IAVSSIQKAK |
| 366 | P46100 | ATRX  | KSMSKIGAAR |
| 367 | P43357 | MAGA3 | MEVDPIGHLV |
| 368 | P42772 | CDN2B | AGADPNGVNR |
| 369 | P41212 | ETV6  | RIVDPNGLAR |
| 370 | P40926 | MDHM  | MISDAIPELK |
| 371 | P39880 | CUX1  | QLSAKNSTLK |
| 372 | P36871 | PGM1  | RIAAANGIGR |
| 373 | P35670 | ATP7B | SIEDRISNLK |
| 374 | P35520 | CBS   | KVQPSDQVGK |
| 375 | P33993 | MCM7  | REVRADSVGK |
| 376 | P33981 | TTK   | GLNSPNSILK |
| 377 | P32856 | STX2  | ILSAPNPEGK |
| 378 | P32004 | L1CAM | VTMGQNGNLY |
| 379 | P31937 | 3HIDH | AYSGANGILK |
| 380 | P31785 | IL2RG | RTMPRIPTLK |
| 381 | P31350 | RIR2  | GSFASIFWLK |
| 382 | P31327 | CPSM  | RLRDADPILR |
| 383 | P31150 | GDIA  | IIIPQNQVNR |
| 384 | P29474 | NOS3  | RCVGRIQWGK |
| 385 | P28347 | TEAD1 | QQRDPDSYNK |
| 386 | P25054 | APC   | SVSSSDGYGK |
| 387 | P23381 | SYWC  | GFTDSDCIGK |
| 388 | P22607 | FGFR3 | NPTPSISWLK |
| 389 | P22105 | TENX  | RTCPSNCHGR |
| 390 | P20702 | ITAX  | VSHPQNPSLR |
| 391 | P20248 | CCNA2 | SLIDADPYLK |
| 392 | P20020 | AT2B1 | KILSANGEAK |
| 393 | P17752 | TPH1  | GLLSSISELK |
| 394 | P17301 | ITA2  | NTFGAIQYAR |
| 395 | P17020 | ZNF16 | KTFSQNSVLK |
| 396 | P17020 | ZNF16 | KAFSQNSSLK |
| 397 | P16499 | PDE6A | QMKSQNPLAK |
| 398 | P15863 | PAX1  | AAAPAIGTGR |

|     |        |       |             |
|-----|--------|-------|-------------|
| 399 | P15516 | HIS3  | SMTGADSHAK  |
| 400 | P14679 | TYRO  | SANDPIFLLH  |
| 401 | P14410 | SUIS  | LPSDPISTLR  |
| 402 | P13667 | PDIA4 | KRSPPIPLAK  |
| 403 | P12270 | TPR   | TTSSQDGQGK  |
| 404 | P12110 | CO6A2 | FAVAPNQNLK  |
| 405 | P11172 | UMPS  | ALGPSICMLK  |
| 406 | P0DP23 | CALM1 | RVFDKDGNGY  |
| 407 | P0DJD0 | RGPD1 | MLMRRDQVLK  |
| 408 | P0CB47 | UBFL1 | MTGGPDPRLK  |
| 409 | P09471 | GNAO  | MLFDSICNNK  |
| 410 | P09238 | MMP10 | LSFDAISTLR  |
| 411 | P08151 | GLI1  | SSSSSISSAY  |
| 412 | P07451 | CAH3  | MTVSSDQMAK  |
| 413 | P05556 | ITB1  | ASNGQICNGR  |
| 414 | P05549 | AP2A  | NAVSAIPINK  |
| 415 | P05155 | IC1   | AAASAVISVAR |
| 416 | P04899 | GNAI2 | KLFDSICNNK  |
| 417 | P04114 | APOB  | TTKAQIPILR  |
| 418 | P04114 | APOB  | ILTDPDGK GK |
| 419 | P01106 | MYC   | RVLRQISNNR  |
| 420 | P01031 | CO5   | KMTDKNFLGR  |
| 421 | O95837 | GNA14 | VRAARDFILK  |
| 422 | O95793 | STAU1 | SRLAQIQQAK  |
| 423 | O95490 | AGRL2 | KQNSRNLAK   |
| 424 | O95405 | ZFYV9 | VTLDSDQVGY  |
| 425 | O95359 | TACC2 | VAQDRIPSGK  |
| 426 | O95359 | TACC2 | ASDAKNQEGK  |
| 427 | O95302 | FKBP9 | GVIPPNSVLH  |
| 428 | O95025 | SEM3D | SGTASDFLGK  |
| 429 | O94911 | ABCA8 | RCIGSIQHLK  |
| 430 | O94885 | SASH1 | PTASRISLGK  |
| 431 | O94804 | STK10 | QLLDRDFVAK  |
| 432 | O75970 | MPDZ  | SPAGKNGTLK  |
| 433 | O75923 | DYSF  | GLQPKDPNGK  |
| 434 | O75864 | PPR37 | ASPPADGRLK  |
| 435 | O75764 | TCEA3 | RVRSRISNLK  |
| 436 | O75626 | PRDM1 | ARSSPDQSLK  |
| 437 | O75592 | MYCB2 | SVISKDGELY  |
| 438 | O75427 | LRCH4 | GPSSPDSVLR  |

|     |        |       |            |
|-----|--------|-------|------------|
| 439 | O75427 | LRCH4 | GAPRKDSLLK |
| 440 | O75367 | H2AY  | IAFPSIGSGR |
| 441 | O60687 | SRPX2 | IISAPDPSNR |
| 442 | O60673 | REV3L | GYTSANFSGR |
| 443 | O60613 | 45550 | YVRGSDPVLK |
| 444 | O60504 | VINEX | VLQPSNQVLR |
| 445 | O60499 | STX10 | MVSGSIQVLK |
| 446 | O60343 | TBCD4 | KLERANSQLK |
| 447 | O60331 | PI51C | TVFRKNSSLK |
| 448 | O60303 | KATIP | YVNGANSELK |
| 449 | O60287 | NPA1P | AVRSSIFRLY |
| 450 | O60264 | SMCA5 | ASGGSNSSNK |
| 451 | O43752 | STX6  | LVSGSIGVLK |
| 452 | O43583 | DENR  | VTIAKIPRAK |
| 453 | O43493 | TGON2 | KQTPKDGSNK |
| 454 | O43491 | E41L2 | KHQASISELK |
| 455 | O43196 | MSH5  | VITGPNSSGK |
| 456 | O43148 | MCES  | RSQSRIFYLR |
| 457 | O15446 | RPA34 | FSCPPNFTAK |
| 458 | O15079 | SNPH  | MEVAQNGMAK |
| 459 | O15072 | ATS3  | TAFGKDFHLR |
| 460 | O15040 | TCPR2 | AVGSSIGMLY |
| 461 | O15018 | PDZD2 | SSKGSSELK  |
| 462 | O14965 | AURKA | SSKPSNCQNK |
| 463 | O14964 | HGS   | RACGQIFCGK |
| 464 | O14818 | PSA7  | AVMRRDQSLK |
| 465 | O14802 | RPC1  | TVISPDPNLR |
| 466 | O14795 | UN13B | AAQDADSVLR |
| 467 | O14793 | GDF8  | KFSSKIQYNK |
| 468 | O14727 | APAF  | ASCSADGTLK |
| 469 | O14715 | RGPD8 | IVMRRDQVLK |
| 470 | O14686 | KMT2D | GVLAKNPQLR |
| 471 | O14646 | CHD1  | SDSDSISEGK |
| 472 | O14645 | IDLC  | MIPPADSLLK |
| 473 | O14617 | AP3D1 | LIEDSDQNLK |
| 474 | C9JBD0 | KRBX1 | RIVSKIFRNR |
| 475 | B7Z6K7 | ZN814 | KSFSSIGHLR |
| 476 | B6SEH8 | ERVV1 | STRDSISKLK |
| 477 | B2RTY4 | MYO9A | NTESSNPVLK |
| 478 | A8K8P3 | SFI1  | ACVARIQALR |

|     |            |       |            |
|-----|------------|-------|------------|
| 479 | A8CG34     | P121C | SSNAPDPCAK |
| 480 | A6NN90     | CB081 | GGVDRIPLGR |
| 481 | A6NKT7     | RGPD3 | ILMRRDQVLK |
| 482 | A6NGD5     | ZSA5C | KESDPIQALR |
| 483 | A6NFN9     | ANKUB | ATPSADFLK  |
| 484 | A6NDA9     | LRIT2 | TCMASNSIGK |
| 485 | A4UGR9     | XIRP2 | ASNSQNSQAK |
| 486 | A4FU69     | EFCB5 | SQSRKDSILK |
| 487 | A4D1E9     | GTPBA | GANSKISALK |
| 488 | A3QJZ7     | PRA27 | SQCPSISQLK |
| 489 | A2RRP1     | NBAS  | LSIWAIPSLK |
| 490 | A0PK05     | TMM72 | SLEPADSLAK |
| 491 | A0A494C086 | SPD21 | KTRSRIPLLR |
| 492 | A0A0A6YYK4 | TVB71 | RSEGSISTLK |
| 493 | A0A096LP49 | CC187 | GSFPQNPLGK |



Supplementary Table 11. Homologous peptides and minigene-clusters for hTCR-KO TCR1a7 T cells

| ID | Uniprot ID | Protein Name | Peptide Sequence | 30-mer Minigene Sequence                                    | Minigene-Cluster ID | Minigene-Cluster Sequence                                                                                                                                                                                                                                                                                                                                                     |
|----|------------|--------------|------------------|-------------------------------------------------------------|---------------------|-------------------------------------------------------------------------------------------------------------------------------------------------------------------------------------------------------------------------------------------------------------------------------------------------------------------------------------------------------------------------------|
| 1  | Q7Z7M9     | GALT5        | RTIPPDVIAK       | IFVWPMNFGWRTIPPDVIAKNRIKETDIR                               | TCR1a7_MC-01        | IFVWPMNFGWRTIPPDVIAKNRIKETDIRRAGPGRS<br>GSVRTAPPDGAARPPGLFRALLQGPLRGRPIIATF<br>SANPEAKAAAAFPQTSQVLSVVMGKCTRVDGSDNPI<br>AKGRVAIAGGALGNMSSLLAGKVQPSDQVGVKQKQIR<br>QFKQIRHKPQGNFSFKSTNSSDVSAKSGAVTFSSYQ<br>GLLALIEEVACGTVLGPNVGVKRAIVNSLAQAVILAG<br>NLLSHSTQSRDSINKAKYLTKKTOAATLNKDATKAA<br>TAAADFTAKVWDVSGDELASVMTDEYLYSGTASD<br>FLGKDTAFTRSLGPILLNKHIDAYKTFPTEPKKDKK<br>KKADET |
| 2  | Q7Z2K8     | GRIN1        | RTAPPDGAAK       | RAGPGRSGSVRTAPPDGAARPPGLFRALL                               |                     |                                                                                                                                                                                                                                                                                                                                                                               |
| 3  | Q96L91     | EP400        | ATFSANPEAK       | QGQLRGRPIIATFSANPEAKAAAAFPQTSQ                              |                     |                                                                                                                                                                                                                                                                                                                                                                               |
| 4  | Q8N6F1     | CLD19        | RVGDSNPIAK       | VLSVVMGKCTRVDGSDNPIAKGRVAIAGGAL                             |                     |                                                                                                                                                                                                                                                                                                                                                                               |
| 5  | P35520     | CBS          | KVQPSDQVGVK      | GNMSSLLAGKVQPSDQVGVKQKQKQIR                                 |                     |                                                                                                                                                                                                                                                                                                                                                                               |
| 6  | Q75717     | WDHD1        | STNSSDVSIAK      | HKPGQNSFSKSTNSSDVSAKSGAVTFSSYQ                              |                     |                                                                                                                                                                                                                                                                                                                                                                               |
| 7  | Q96M86     | DNHD1        | TVLGPNGVGVK      | LLALEEVACGTVLGPNVGVKRAIVNSLAQA                              |                     |                                                                                                                                                                                                                                                                                                                                                                               |
| 8  | P49005     | DPD02        | STQSRDSINK       | VILAGNLLSHSTQSRDSINKAKYLTKKTOA                              |                     |                                                                                                                                                                                                                                                                                                                                                                               |
| 9  | Q9Y3F4     | STRAP        | ATAAADFTAK       | ATLNKDATKAAATAAADFTAKVWDVSGDEL                              |                     |                                                                                                                                                                                                                                                                                                                                                                               |
| 10 | Q95025     | SEM3D        | SGTASDFLGK       | ASVMTDEYLYSGTASDFLGKDTAFTRSLGP                              |                     |                                                                                                                                                                                                                                                                                                                                                                               |
| 11 | P07358     | CO8B         | HSFGSNAVNAK      | SLPGSRGERPHSFGSNAVNSKFAKSRQMR                               | TCR1a7_MC-02        | SLPGSRGERPHSFGSNAVNSKFAKSRQMRSTYIKPI<br>SKLQATNARDALAKHIYAKLNFYIYHICIIHFSNP<br>PNVNRNKRIRSRVMDTIKPFVITGLQDTSVSSDVAK<br>FAVKATGEPLREDSYDVAFHSSKAYIASAGADALAK<br>VFKWEDKDAKIFRVDVDPNGLARLWGNHKNRNV<br>GKSAAPALGSGSPDVAKLKLGQSPVSKLEVAN<br>LLLQKASPDAAAGKSLTPLHVAAMQWVLPKTIKLF<br>APDPENKGTVCMSVSELLIISMTGVAALDSNVSGK<br>IGLRAVVYFILLNKHIDAYKTFPTEPKKDKKDKK<br>ET                |
| 12 | Q9Y411     | MY05A        | ATNARDALAK       | TYIKFISKLQATNARDALAKHIYAKLNFWI                              |                     |                                                                                                                                                                                                                                                                                                                                                                               |
| 13 | Q6PIJ6     | FBX38        | FSNPPNVRNK       | YPYHICIIHFSNPVNRNKRIRSRVMDTI                                |                     |                                                                                                                                                                                                                                                                                                                                                                               |
| 14 | Q8WZ42     | TITIN        | TVVSSDVAK        | KPVIITGLQDTSVSSDVAKFAVKATGEPR                               |                     |                                                                                                                                                                                                                                                                                                                                                                               |
| 15 | Q13033     | STRN3        | ASAGADALAK       | LDESIVDVAFHSSKAYIASAGADALAKVFF                              |                     |                                                                                                                                                                                                                                                                                                                                                                               |
| 16 | Q9Y603     | ETV7         | RVDVDPNGLAR      | KWEDKDAKIFRVDVDPNGLARLWGNHKNRNV                             |                     |                                                                                                                                                                                                                                                                                                                                                                               |
| 17 | Q9P2J2     | TUTLA        | GSGSPDVAK        | TGKSAAPALGSGSPDVAKLKLGQSPVPS                                |                     |                                                                                                                                                                                                                                                                                                                                                                               |
| 18 | Q12955     | ANK3         | KSASPDAAAGK      | KLEVANLLQKASPDAAAGKSLTPLHVAAMQWVLPKTIKLF                    |                     |                                                                                                                                                                                                                                                                                                                                                                               |
| 19 | Q7Z7G8     | VP13B        | KLFAPDPENK       | MQWVLPKTIKLFAPDPENKGTVCMSVSELL                              |                     |                                                                                                                                                                                                                                                                                                                                                                               |
| 20 | P43005     | EAA3         | AALDSNVSGK       | LIISMITGVAALDSNVSGKIGLRAVVYFILLNKHIDAYKTFPTEPKKDKKDKK<br>ET |                     |                                                                                                                                                                                                                                                                                                                                                                               |
| 21 | Q7RTX1     | TS1R1        | AVIGPDSTNR       | DLLHYSPTVLAVIGPDSTNRAATTAALLSP                              | TCR1a7_MC-03        | DLLHYSPTVLAVIGPDSTNRAATTAALLSPIKQYLSHI<br>LEQRTSSNVINKRENLEKKNKILPYLSSEAITAR<br>DSMAKLSYALFDWIEPLPAPDGTGVGPPNSEGK<br>DPAGAYRSPSEAFESVFTETNKVVPADSIGKDG<br>KQDLVILIKNERGKIIPADFEAKLEAKQGVYKRS<br>SNDSLNSVSSDGYKGRGMKPSIESVVDVSKGIV<br>NAVKDPDSSGKFAFVGYKRSYQIISLTSFSSSNAP<br>DPAKETVLSALKEKRIRIFEDIRRLIQPSDVIKVVAF<br>SLDEPWILLNKHIDAYKTFPTEPKKDKKDKKKADET                     |
| 22 | Q5TEA6     | SE1L2        | QRTSSNVINK       | IKQYLSHILEQRTSSNVINKRENLEKKNK                               |                     |                                                                                                                                                                                                                                                                                                                                                                               |
| 23 | Q13459     | MY09B        | AITARDSMAK       | KLILPYLSSEAITARDSMAKLSYALFDWIE                              |                     |                                                                                                                                                                                                                                                                                                                                                                               |
| 24 | Q9ULL5     | PRR12        | GVGPPNSEGK       | EPLPAPDGTGVGPPNSEGKDPAGAYRSPS                               |                     |                                                                                                                                                                                                                                                                                                                                                                               |
| 25 | Q92968     | PEX13        | VPVAPDSIGK       | EAAFESVFTETNKVVPADSIGKDGKQDL                                |                     |                                                                                                                                                                                                                                                                                                                                                                               |
| 26 | Q99259     | DCE1         | KIIPADFEAK       | VILIKNERGKIIPADFEAKLEAKQGVY                                 |                     |                                                                                                                                                                                                                                                                                                                                                                               |
| 27 | P25054     | APC          | SVSSSDGYGK       | YKRSNSDLSNVSSDGYKGRGMKPSIES                                 |                     |                                                                                                                                                                                                                                                                                                                                                                               |
| 28 | Q16795     | NDUA9        | AVKDPDANGK       | VVDVSKGIVNAVKDPDANGKSAFVGPSTRY                              |                     |                                                                                                                                                                                                                                                                                                                                                                               |
| 29 | Q96HA1     | P121A        | SSNAPDPCAK       | QIISSTLSSPSSNAPDPAKETVLSALKEK                               |                     |                                                                                                                                                                                                                                                                                                                                                                               |
| 30 | Q96MI9     | CBPC4        | LIQPSDVINK       | RIRIFEDIRRLIQPSDVINKVVFSLDEPWP                              |                     |                                                                                                                                                                                                                                                                                                                                                                               |
| 31 | Q14683     | SMC1A        | AIIGPNGSGK       | QIIGPFQRTFAIGPNGSGKSNLMDAISFV                               | TCR1a7_MC-04        | QIIGPFQRTFAIGPNGSGKSNLMDAISFVSNPPIKIC<br>GHVISRDALNKLINGGKLCPCYDEYHPEEDLQHTAS<br>DFVAKVDDPKLANSEQVDVQFHAGNYSCVASNVQ<br>KHSTSMFFRVVTEPILPEHFLNPKASKDSRGIADPN<br>QSAKIFRPLTVESAVDARDIAKVLVYALLFSWL<br>DKESKIFRIVDPNGLARLWGNHKNRNTNVKPMTR<br>PQAVNARDALAKKIYALHDFDICIVDLLKEPMTVSS<br>DQMAKRLSLSAENPTMNLISODKRISSNPVAKII<br>YGDVPTVILLNKHIDAYKTFPTEPKKDKKDKKKADET                 |
| 32 | Q96G75     | RMD5B        | HVISRDALNK       | SNPPIKICGHVISRDALNKLINGGKLCPC                               |                     |                                                                                                                                                                                                                                                                                                                                                                               |
| 33 | P50542     | PEX5         | QHTASDFVAK       | YDEYHPEEDLQHTASDFVAKVDDPKLANSE                              |                     |                                                                                                                                                                                                                                                                                                                                                                               |
| 34 | P07333     | CSF1R        | SCVASNVQGK       | QVDFQHAGNYSCVASNVQGKHSSTSMFFRVV                             |                     |                                                                                                                                                                                                                                                                                                                                                                               |
| 35 | Q9H2U9     | ADAM7        | GIADPNQSAK       | TEPILPEHFLNPKASKDSRGIADPNQSAK                               |                     |                                                                                                                                                                                                                                                                                                                                                                               |
| 36 | Q9UKN7     | MYO15        | AVDARDAIAK       | KIFTPLTVESAVDARDIAKVLVYALLFSWL                              |                     |                                                                                                                                                                                                                                                                                                                                                                               |
| 37 | P41212     | ETV6         | RIVDPNGLAR       | RWEDKESKIFRIVDPNGLARLWGNHKNRNT                              |                     |                                                                                                                                                                                                                                                                                                                                                                               |
| 38 | Q9NQX4     | MY05C        | AVNARDALAK       | TVVKPMTRPQAVNARDALAKKIYALHDFDI                              |                     |                                                                                                                                                                                                                                                                                                                                                                               |
| 39 | P07451     | CAH3         | MTVSSDQMAK       | CIVWLLLEKPMVSSDQMAKRLSLSSAEN                                |                     |                                                                                                                                                                                                                                                                                                                                                                               |
| 40 | Q63HN8     | RN213        | KRISSNPVAK       | PTMNLISODKRISSNPVAKIIYGDVPTVILLNKHIDAYKTFPTEPKKDKKDKKKADET  |                     |                                                                                                                                                                                                                                                                                                                                                                               |
| 41 | Q9C0D6     | FHDC1        | SVGSSDPENK       | PDEPGSAAALGSGSSDPENKDRPPLFCISD                              | TCR1a7_MC-05        | PDEPGSAAALGSGSSDPENKDRPPLFCISDVGAA<br>LRAFTSETPPDVTAKACQVCSAWIAALTPVPVFLKS<br>VSPANGKPKPKVPERKSSKNLASVQSEIAPN<br>PLAKEELNFLARLIRLHQLGRQKSLWADVHGK<br>RSHIDALREVLFTSGTRRAVSPNPKARQARSRL<br>WLPMSLKLQASNVNTKRAVSPNPKARQARSRLWDP<br>EVAKCQTQTPDADSRNKKERQREGTEVLDAV<br>KEVSSSDVSGKESVPEEPLRRTWDDSDPES<br>ETDPDAQAKAYVARVLSPPILLNKHIDAYKTFPTEP<br>KKDKKDKKKADET                   |
| 42 | Q86XA9     | HTR5A        | SETPPDVTAK       | VGAALRPAFTSETPPDVTAKACQVCSAWIA                              |                     |                                                                                                                                                                                                                                                                                                                                                                               |
| 43 | Q5SYE7     | NHSL1        | SVSPANGKPK       | ALTPVPVFLKSVPANGKPKPKVPERKS                                 |                     |                                                                                                                                                                                                                                                                                                                                                                               |
| 44 | Q8WVF1     | OSCP1        | ESIAPNPLAK       | SSKNLASWVTEQESIAPNPLAKEELNFLARL                             |                     |                                                                                                                                                                                                                                                                                                                                                                               |
| 45 | Q8TDR4     | TCP1L        | KSLWADVHGK       | IRLHQLGRQKSLWADVHGKLRSHIDALRE                               |                     |                                                                                                                                                                                                                                                                                                                                                                               |
| 46 | Q14244     | MAP7         | AVSPNPKAR        | VFLFTSGTRRAVSPNPKARQARSRLWLP                                |                     |                                                                                                                                                                                                                                                                                                                                                                               |
| 47 | Q9UKM9     | RALY         | KLQASNVTKN       | MSLKLQASNVTKNPKSINSRVFIGNLNT                                |                     |                                                                                                                                                                                                                                                                                                                                                                               |
| 48 | Q96H86     | ZN764        | QTDPADSRNK       | QDPEVAKCQTQTPDADSRNKKERQREGTG                               |                     |                                                                                                                                                                                                                                                                                                                                                                               |
| 49 | Q5T5Y3     | CAMP1        | GSSSDVSGK        | EVLDAVKEVSSSDVSGKESVPEEPLR                                  |                     |                                                                                                                                                                                                                                                                                                                                                                               |
| 50 | Q5XUX1     | FBXW9        | SETDPDAQAK       | RTWDDSDPESETDPDAQAKAYVARVLSPP                               |                     |                                                                                                                                                                                                                                                                                                                                                                               |
| 51 | Q99650     | OSMR         | IVISADPENK       | NSVGASPASVIVISADPENKEVEEERAGT                               | TCR1a7_MC-06        | NSVGASPASVIVISADPENKEVEEERAGTANMDFV<br>DRMFTNPRDSYGKPLVKDRAELAQEHSTKVLGTV<br>SGPDSLARSTEKPEEEELREVLHWPITANSSKPS<br>NCQNKESASKQSEEPQAGDARFSCPNNFTAKPPA<br>SESPRFSVTRTGEQAPASAPRNQVARMLSATTMIQ<br>VQVPSASVSGKLESPDVPVARRVYLTQLKQREL<br>HLQDNNVRIARDLARIFLLEKHLHLEINNLESKFK<br>SRASNAQAKPSSFFLQMQKTMIGVAVDVTGILGNSV<br>EGKQVLTQGTFRILLNKHIDAYKTFPTEPKKDKK<br>KADET               |
| 52 | Q8N1G2     | CMTR1        | FTNPRDSYGK       | ANMDFVDRMFTNPRDSYGKPLVKDRAEL                                |                     |                                                                                                                                                                                                                                                                                                                                                                               |
| 53 | P58304     | VX2          | TVSGPDSLAR       | AQEHSTKVLGTVSGPDSLARKMFGKPEEEEA                             |                     |                                                                                                                                                                                                                                                                                                                                                                               |
| 54 | O14965     | AURKA        | SSKPSNCQNK       | LREVLEHPWITANSSKPSNCQNKESASKQS                              |                     |                                                                                                                                                                                                                                                                                                                                                                               |
| 55 | O15446     | RPA34        | FSCPPNFATK       | EPEQAGDAARFSCPNNFTAKPPASESPRFS                              |                     |                                                                                                                                                                                                                                                                                                                                                                               |
| 56 | Q13332     | PTPRS        | ASAPRNQVQR       | VVTRTGEQAPASAPRNQVARMLSATTMIQ                               |                     |                                                                                                                                                                                                                                                                                                                                                                               |
| 57 | Q9UNY4     | TTF2         | KVEPSDVAR        | KVSPASVSGKLESPDVPVARRVYLTQLKQ                               |                     |                                                                                                                                                                                                                                                                                                                                                                               |
| 58 | Q9NZU1     | FLRT1        | RTIARDSLAR       | RELHLQDNNVRIARDSLARIFLLEKHLHLD                              |                     |                                                                                                                                                                                                                                                                                                                                                                               |
| 59 | Q53SF7     | COBL1        | KSRASNAQAK       | EINNILESKFKSRASNAQAKPSSFFLQMQK                              |                     |                                                                                                                                                                                                                                                                                                                                                                               |
| 60 | Q16401     | PSMD5        | GILGNSVEGK       | TMIGVAVDVTGILGNSVEGKQVLTQGTFR                               |                     |                                                                                                                                                                                                                                                                                                                                                                               |
| 61 | Q76FK4     | NOL8         | ISNSSDVSIAK      | REIKTDFLSISNSSDVSIAKDKHAEDNEKR                              | TCR1a7_MC-07        | REIKTDFLSISNSSDVSIAKDKHAEDNEKRSCFDYT<br>GKLIATASADGTARIFAATRKICIEFGIDLTRVALV<br>GNGAGKSTLLKLLTGNNYASVECGAKILANPEAK<br>STSAIENMTTRTFSDTHGSPNSDPLGRADKASDT<br>SSEDAIVFTVQGRAICSDPNPKRVKNVAVYLRVV<br>DTRHEVTVFAADAMARLSGTVGAAVWTSASSW<br>AVRKLTPADQVNYYSRRGRNNSGFTLRPEVETAL<br>VGPNGSGKSTVAALLQNLSDILGSSSSSGLSSDPL<br>AKGSATAESPVAILLNKHIDAYKTFPTEPKKDKK<br>KADET                |
| 62 | Q8N136     | DAW1         | ATASADGTAR       | SCFDYTGKLIATASADGTARIFAATRKICI                              |                     |                                                                                                                                                                                                                                                                                                                                                                               |
| 63 | Q9UG63     | ABC2F        | ALVGPNGAGK       | EFGLDTRVALVGPNGAGKSTLLKLLTG                                 |                     |                                                                                                                                                                                                                                                                                                                                                                               |
| 64 | Q9UBS9     | SUCO         | KILANPEAK        | NNYASVECGAKILANPEAKSTSAIENMT                                |                     |                                                                                                                                                                                                                                                                                                                                                                               |
| 65 | Q86V48     | LUZP1        | GSPVSDPLGR       | TTRTFSDTHGSPVSDPLGRADKASDTSS                                |                     |                                                                                                                                                                                                                                                                                                                                                                               |
| 66 | Q92583     | CCL17        | RAICSDPNNK       | DAIVFTVQGRAICSDPNPKRVKNVAVYLRV                              |                     |                                                                                                                                                                                                                                                                                                                                                                               |
| 67 | A1L0T0     | HACL2        | AVFAADAMAR       | RVVDTRHEVTVFAADAMARLSGTVGVAAV                               |                     |                                                                                                                                                                                                                                                                                                                                                                               |
| 68 | Q99590     | SCAFB        | KTLPADVQNY       | WTSASSWAVRKLTPADVQNYYSRRGRNNSG                              |                     |                                                                                                                                                                                                                                                                                                                                                                               |
| 69 | Q03518     | TAP1         | ALVGPNGSGK       | TFTLRPEVETALVGPNGSGKSTVAALLQNL                              |                     |                                                                                                                                                                                                                                                                                                                                                                               |
| 70 | Q7Z309     | PBIR2        | SGLSSDPLAK       | SDILDGSSSSSGLSSDPLAKGSATAESPVA                              |                     |                                                                                                                                                                                                                                                                                                                                                                               |
| 71 | P53355     | DAPK1        | LLDPPDPLGK       | NLLTRRKLRLDPPDPLGKDWCLLAMNLGN                               | TCR1a7_MC-08        | NLLTRRKLRLDPPDPLGKDWCLLAMNLGNLGN<br>MKLVCGHISRDALNKMFNGSKLCPVVALILALMLS<br>MTGADSHAKRHHGKRFHECGGDKGRVKVITGP<br>NSGKSIYLVKQGLISAPSKPAASIASGGSNSNKG<br>GPEGVAAQANLNFYEGHITSLGPNAGKTTTISML<br>TGLGTVAIKVDDRARRAPPDFVNFKLPRELILRQELS<br>ETILTMVANCNSVMNKARQPPGMPYDNLNYSIN<br>NLSISANVENKYSYLVGLVALQPNLMLSLLEPA<br>DSLAKKKQVHFEDNILLNKHIDAYKTFPTEPKKDK<br>KKADET                   |
| 72 | Q9H871     | RMD5A        | HIISRDALNK       | NNPMLKVCGHISRDALNKMFNGSKLCP                                 |                     |                                                                                                                                                                                                                                                                                                                                                                               |
| 73 | P15516     | HIS3         | SMTGADSHAK       | VFALILALMLSMTGADSHAKRHHGKRFK                                |                     |                                                                                                                                                                                                                                                                                                                                                                               |
| 74 | Q43196     | MSH5         | VITGPNSSGK       | ECGGDKGRVKVITGPNSSGKSIYLVKQGLI                              |                     |                                                                                                                                                                                                                                                                                                                                                                               |
| 75 | Q06264     | SMCA5        | ASGGSNSNKG       | SAPSKPAASIASGGSNSNKGPEGVAQA                                 |                     |                                                                                                                                                                                                                                                                                                                                                                               |
| 76 | Q86UK0     | ABCAC        | SLGPNAGGAK       | NLNFYEGHITSLGPNAGKTTTISMLTGL                                |                     |                                                                                                                                                                                                                                                                                                                                                                               |
| 77 | Q9BXA6     | TSSK6        | RRAPPDFVNK       | GTVAIKVDDRARRAPPDFVNFKLPRELSILR                             |                     |                                                                                                                                                                                                                                                                                                                                                                               |
| 78 | A5YK66     | CNOT1        | VANCNSVMNK       | QELSETILTMVANCNSVMNKARQPPGMP                                |                     |                                                                                                                                                                                                                                                                                                                                                                               |
| 79 | Q6NVV3     | NIPAF3       | LSISANVENK       | YTDLNYISNLSISANVENKYSYLVGLVAL                               |                     |                                                                                                                                                                                                                                                                                                                                                                               |
| 80 | A0PK05     | TMM72        | SLEPADSLAK       | LQPPNLMELSEPADSLAKKQVHFEDNILLNKHIDAYKTFPTEPKKDKK<br>KKADET  |                     |                                                                                                                                                                                                                                                                                                                                                                               |

|     |        |       |             |                                         |                                                                         |                                                                                                                                                                                                                                                                                                                                                                                                                                                    |
|-----|--------|-------|-------------|-----------------------------------------|-------------------------------------------------------------------------|----------------------------------------------------------------------------------------------------------------------------------------------------------------------------------------------------------------------------------------------------------------------------------------------------------------------------------------------------------------------------------------------------------------------------------------------------|
| 81  | Q9BZH6 | WDR11 | RLASADVNGK  | HHNIGSPYCLRLASADVNGKIIVWVDAAGV          | TCR1a7_MC-09                                                            | HHNIGSPYCLRLASADVNGKIIVWVDAAGVQSSER<br>NQDRKESPPNSRAKDKFLDQERSNASEILKCKFKIL<br>SANGEAKVFRPRDRDDIFNQEGVPRPSYVFSADPIA<br>RPSEINFDGKITVPIVPHVLSFSDADSSAKAGVSKDA<br>IVTASLLIDGELYSGTAAADFMRDFAIFRTLGHSGRT<br>AVLSESDASQGRDSQGKPSRSLTRTPEENLLEVMK<br>SLSVSSDFLGKDKPVSCLGARSQSDHYGGGGRSL<br>DANSSGRLPDAYSQGHDPSPYKAGHDPKQSDSDA<br>CGKGFNHSMEVIHLLNKHIDAYKTFPPEPKDKKK<br>KADET                                                                            |
| 82  | Q9H0G5 | NSRP1 | KESSPNSRAK  | VQSSERNQDRKESPPNSRAKDKFLDQERSN          |                                                                         |                                                                                                                                                                                                                                                                                                                                                                                                                                                    |
| 83  | P20020 | AT2B1 | KILSANGAEAK | ASEIILKCKFKILSANGAEAKVFRPRDRDDI         |                                                                         |                                                                                                                                                                                                                                                                                                                                                                                                                                                    |
| 84  | Q96Q89 | KI20B | YVFSADPIAR  | FNQEGVPRPSYVFSADPIARPSEINFDGKI          |                                                                         |                                                                                                                                                                                                                                                                                                                                                                                                                                                    |
| 85  | Q9NPG3 | UBN1  | LFSADSSAK   | ITPVPPIVHLSFSDADSSAKAGVSKDAIVT          |                                                                         |                                                                                                                                                                                                                                                                                                                                                                                                                                                    |
| 86  | Q14563 | SEM3A | SGTAADFMGR  | ASLLIDGELYSGTAAADFMRDFAIFRTLGH          |                                                                         |                                                                                                                                                                                                                                                                                                                                                                                                                                                    |
| 87  | Q502W7 | CCD38 | ASQGRDSQGK  | SGRTAVLSESDASQGRDSQGKPSRSLTRTPE         |                                                                         |                                                                                                                                                                                                                                                                                                                                                                                                                                                    |
| 88  | Q3V6T2 | GRDN  | LSVSSDFLGK  | ENLLEVMKSLSVSSDFLGKDKPVSCLGAR           |                                                                         |                                                                                                                                                                                                                                                                                                                                                                                                                                                    |
| 89  | Q8N7X1 | RMXL3 | RSLDANSSGR  | SQSDHYGGGGRSLDANSSGRLPDAYSQGH           |                                                                         |                                                                                                                                                                                                                                                                                                                                                                                                                                                    |
| 90  | Q86UD4 | ZN329 | RTGDSDACGK  | PSYPKSYADKRTGDSDACGKGFNHSMEVIH          |                                                                         |                                                                                                                                                                                                                                                                                                                                                                                                                                                    |
| 91  | Q8N456 | LRC18 | NLISPNSMAK  | TTTTPRKTFIPNLISPNSMAKDSWEDWRIRL         | TCR1a7_MC-10                                                            | TTTTPRKTFIPNLISPNSMAKDSWEDWRIRLVNSRAS<br>PNLIGATGANSLGKVMPTKSPPPPSASPQERSE<br>DSSPDSKAKTRTPLRQRSRVEEVKKNHSILSAPNP<br>EGKIKEELEDLNKPMEDAAPILSLLASPDPAQKHPQ<br>DLASTPSLRAAWSPYEDAVPAANARGKSKAKAP<br>APSASFSTCLKMVASPDSLKMSAQCGQKPLLSRLV<br>EFSAFLEQORPDPSYNKHLFVHIGHANSYQAYIRILA<br>KIQAADPVNRFKRPDELLHLRNGDVSVRKRLVDA<br>NVNAKDMAGRKSSPLLILNKHIDAYKTFPPEPKD<br>KKKKADET                                                                             |
| 92  | Q02078 | MEF2A | GATGANSLGK  | VNSRASPNLIGATGANSLGKVMPTKSPPPP          |                                                                         |                                                                                                                                                                                                                                                                                                                                                                                                                                                    |
| 93  | Q9UQ35 | SRRM2 | SDSSPDSKAK  | PSASPQERSESDSSPDSKAKTRTPLRQRSR          |                                                                         |                                                                                                                                                                                                                                                                                                                                                                                                                                                    |
| 94  | P32856 | STX2  | ILSAPNPEGK  | VEEVKKNHSILSAPNPEGKIKEELEDLNK           |                                                                         |                                                                                                                                                                                                                                                                                                                                                                                                                                                    |
| 95  | Q5VYP0 | S31A3 | LLASPDPAK   | PMEDAAPILSLLASPDPAQKHPQDLASTPS          |                                                                         |                                                                                                                                                                                                                                                                                                                                                                                                                                                    |
| 96  | Q8NEG4 | FAB3F | AVPAANARGK  | LRAAWSPYEDAVPAANARGKSKAKAPAP            |                                                                         |                                                                                                                                                                                                                                                                                                                                                                                                                                                    |
| 97  | Q16586 | SGCA  | MVASPDSHAR  | SASPFSTCLKMVASPDSHARCAQGGQPLLS          |                                                                         |                                                                                                                                                                                                                                                                                                                                                                                                                                                    |
| 98  | P28347 | TEAD1 | QQRPDPSYNK  | RLVEFSAFLEQQRPDPSYNKHLFVHIGHAN          |                                                                         |                                                                                                                                                                                                                                                                                                                                                                                                                                                    |
| 99  | Q7Z2Y5 | NRK   | KIQAADPVNR  | SYQAYIRILAKIQAADPVNRFKRPDELLHL          |                                                                         |                                                                                                                                                                                                                                                                                                                                                                                                                                                    |
| 100 | Q95271 | TNKS1 | LVDAAANVNAK | RNGDVSVRKRLVDAANVNAKDMAGRKSSPL          |                                                                         |                                                                                                                                                                                                                                                                                                                                                                                                                                                    |
| 101 | P22105 | TENX  | RTCPNSCHGR  | EGYVSEDCSIRTCPSNCHGRGRCEEGRCLC          | TCR1a7_MC-11                                                            | EGYVSEDCSIRTCPSNCHGRGRCEEGRCLCAFQLI<br>DDVLDFTSCSDQMGKPTSADLKLGLSSIQLSANTVK<br>QNSRNLAKLVLFIYRSLGLLEGSPKPGITASSNV<br>GRHSRFGSDPVLGSKASTLRDLFIEDPNFKVNY<br>SYAAVQIDAETILNAFKMLDPDGKGINKEYIKRLL<br>ERIPRERAPPSPSDGYNRLNVIPEKPPSPEDVVL<br>KLFLSFGSDVQNKLESAQCVDGEELGQRLQHYA<br>KIAADFRNKDEKYNHIDESYNLHKAQPAERFFDPNQ<br>RGKALHOKQALRILLNKHIDAYKTFPPEPKDKK<br>KKADET                                                                                    |
| 102 | Q5T2R2 | DPS1  | FTSCSDQMGK  | AFQLIDDLVLDFTSCSDQMGKPTSADLKLGL         |                                                                         |                                                                                                                                                                                                                                                                                                                                                                                                                                                    |
| 103 | Q95490 | AGRL2 | KQNSRNLAK   | SSIQLSANTVKQNSRNLAKLVLFIYRSLG           |                                                                         |                                                                                                                                                                                                                                                                                                                                                                                                                                                    |
| 104 | Q13191 | CBLB  | ITASSNVNGR  | LLGEGSPKPGITASSNVNGRHSRFGSDPVL          |                                                                         |                                                                                                                                                                                                                                                                                                                                                                                                                                                    |
| 105 | Q9NY47 | CA2D2 | FIEDPNFKNK  | GSKASTLRDLFIEDPNFKVNYSYAAVQI            |                                                                         |                                                                                                                                                                                                                                                                                                                                                                                                                                                    |
| 106 | Q02045 | MYL5  | KMLDPDGKGGK | DAEETILNAFKMLDPDGKGINKEYIKRLL           |                                                                         |                                                                                                                                                                                                                                                                                                                                                                                                                                                    |
| 107 | Q8NEY8 | PPHLN | RSHPSDGYNR  | ERIPRERAPPSPSDGYNRLNVIPEKPPSP           |                                                                         |                                                                                                                                                                                                                                                                                                                                                                                                                                                    |
| 108 | Q9Y5X2 | SNX8  | SFSGSDVQNK  | SEDVVLKFLSFGSDVQNKLESAQCVDGE            |                                                                         |                                                                                                                                                                                                                                                                                                                                                                                                                                                    |
| 109 | Q92598 | HS105 | AKIAADFRNK  | EELGQRLQHYAKIAADFRNKDEKYNHIDES          |                                                                         |                                                                                                                                                                                                                                                                                                                                                                                                                                                    |
| 110 | Q2M3X9 | ZN674 | RFFDPNQRGK  | YNLHKAQPAERFFDPNQRGKALHOKQALR           |                                                                         |                                                                                                                                                                                                                                                                                                                                                                                                                                                    |
| 111 | Q94804 | STK10 | QLLDRDFAVK  | QKMEEHTQKKQLLDRDFAVKQKEDLEAMK           | TCR1a7_MC-12                                                            | QKMEEHTQKKQLLDRDFAVKQKEDLEAMKVLQT<br>SEQAPSSAPRDVQARMLSTTILVQTYVKTMSLQV<br>INARNALAKHIIYQALFGWICENLRKLEITGVSCR<br>VYAKLLHRYRHILGHPALTHDGRYTCTAANSLGR<br>SEASVYLFRFGLPHLQVATSPDFGKLDIAGEFKE<br>DNFEEIVKLLSHGANVNAKDNELWTPHATVTEKI<br>NKAIRSSSNFLNYDLTRCDYQGRINFDLQORS<br>IGSDSQGRATAANNRQLSSQGFQKSSSGADAF<br>HGKASFATYQHSTILLNKHIDAYKTFPPEPKDKK<br>KADET                                                                                            |
| 112 | P23468 | PTPRD | SSAPRDVQAR  | VLQTSEQAPSSAPRDVQARMLSTTILVQ            |                                                                         |                                                                                                                                                                                                                                                                                                                                                                                                                                                    |
| 113 | Q9ULV0 | MY05B | VINARNALAK  | TYVKTMSLQVQVINARNALAKHIIYQALFGW         |                                                                         |                                                                                                                                                                                                                                                                                                                                                                                                                                                    |
| 114 | Q5XUX0 | FBX31 | GVSCRDVYAK  | CENLRKLEITGVSCRDVYAKLLHRYRHILG          |                                                                         |                                                                                                                                                                                                                                                                                                                                                                                                                                                    |
| 115 | Q6ZMC9 | SIG15 | TCTAANSLGR  | LPALTHDGRYTCTAANSLGRSEASVYLFRF          |                                                                         |                                                                                                                                                                                                                                                                                                                                                                                                                                                    |
| 116 | Q6DD88 | ATLA3 | VATSPDFDGK  | CFLPHLQVATSPDFDGKLDIAGEFKE              |                                                                         |                                                                                                                                                                                                                                                                                                                                                                                                                                                    |
| 117 | Q96T49 | PP16B | LSHGANVNAK  | DNFEEIVKLLSHGANVNAKDNELWTPHATV          |                                                                         |                                                                                                                                                                                                                                                                                                                                                                                                                                                    |
| 118 | Q9H3R2 | MUC13 | RSSSNFLNY   | TVTEKINKAIRSSSNFLNYDLTRCDYQGR           |                                                                         |                                                                                                                                                                                                                                                                                                                                                                                                                                                    |
| 119 | Q15154 | PCM1  | RSIGSDSQGR  | QRINFDLQORSIGSDSQGRATAANNRQL            |                                                                         |                                                                                                                                                                                                                                                                                                                                                                                                                                                    |
| 120 | Q8N4H0 | SPA6L | KQGDADFHGK  | SSQFGKSSSQGDADADFHGKASFATYQHST          |                                                                         |                                                                                                                                                                                                                                                                                                                                                                                                                                                    |
| 121 | Q99424 | ACOX2 | RLRPSDPEAK  | MRYSVIRQRSRLRPSDPEAKVLDYQTTQQK          | TCR1a7_MC-13                                                            | MRYSVIRQRSRLRPSDPEAKVLDYQTTQQKHLGAC<br>GALKNISFGFRDQDNKIAKNCDDGVPDNPEFVAI<br>VAYTDNPEFVAIAYTDPSDPWAREEMLKIASVI<br>DNPEFVAIAYTDPSDPWAREEMLKIASVI<br>DFGIDMSRIVGPNVGVGKSTLLLLLTGK<br>CARYEAIEYGEKICRNFVIGKQLKINSSTIE<br>LVEKVRQLLEAGADPNGVNRFGRRRAIQVMM<br>CVRVNTGRSCVLSGNAENKPIKNQLGLTL<br>MSTDNSLAREFLTDVNRLCNAVQVREAR<br>NLSLAREFLTDVNRLCNAVQVREARLDLNLNATEG<br>NLSGPNVKNSSPCEDMGIAYMKEAQLIARIAAAN<br>GIGRLVIGNGILSILLNKHIDAYKTFPPEPKDKK<br>KADET |
| 122 | Q60716 | CTND1 | ISFGRDQDNK  | HLGACGALKNISFGFRDQDNKIAKNCDDGVP         |                                                                         |                                                                                                                                                                                                                                                                                                                                                                                                                                                    |
| 123 | Q9ULN7 | PNM8B | YTDPSDPWAR  | DNPEFVAIAYTDPSDPWAREEMLKIASVI           |                                                                         |                                                                                                                                                                                                                                                                                                                                                                                                                                                    |
| 124 | Q8NE71 | ABCF1 | CIVGPNVGVK  | DFGIDMSRIVGPNVGVGKSTLLLLLTGK            |                                                                         |                                                                                                                                                                                                                                                                                                                                                                                                                                                    |
| 125 | Q96N23 | CAF54 | KITCRNFIGK  | CARYEAIEYGEKICRNFVIGKQLKINSSTIE         |                                                                         |                                                                                                                                                                                                                                                                                                                                                                                                                                                    |
| 126 | P42772 | CDN2B | AGADPNGVNR  | LVEKVRQLLEAGADPNGVNRFGRRRAIQVMM         |                                                                         |                                                                                                                                                                                                                                                                                                                                                                                                                                                    |
| 127 | Q8N9Z0 | ZN610 | CVLGSNAENK  | CVRVNTGRSCVLSGNAENKPIKNQLGLTL           |                                                                         |                                                                                                                                                                                                                                                                                                                                                                                                                                                    |
| 128 | Q99698 | LYST  | MSTDNSLAR   | MSTDNSLAREFLTDVNRLCNAVQVREAR            |                                                                         |                                                                                                                                                                                                                                                                                                                                                                                                                                                    |
| 129 | P33032 | MC5R  | NLSGPNVKNK  | LDLNLNATEGNLSGPNVKNKSSPCEDMGIA          |                                                                         |                                                                                                                                                                                                                                                                                                                                                                                                                                                    |
| 130 | P36871 | PGM1  | RIAAANGIGR  | YMKEAQLIARIAAANGIGRLVIGNGILS            |                                                                         |                                                                                                                                                                                                                                                                                                                                                                                                                                                    |
| 131 | Q7RTR0 | NLRP9 | VLEGPDGIGK  | YTAAARRHTVLEGPDGIGKTLLRKVMLD            | TCR1a7_MC-14                                                            | YTAAARRHTVLEGPDGIGKTLLRKVMLDLMEMQ<br>SRHGARTSDSQQAYLVQRGAEDRDLKWDHQR<br>AWSSTDSSSNRNLKPAKMTAQIITFSPFLTLVGP<br>NGAGKTTIECLYIAAHLVDSNGYTCMASNSIGKSN<br>LVISLHVQNSHLENESIKRTRSDGVNRDLTEAVPR<br>LPKPTTVKSPPTVLPNFTAKSKVLTRDTEGRDLA<br>TLPREASTPGRNALGRHEYPRLNRIHQEYL<br>SILTPDGKGEKIAELSATQVIGPFRFRFTCIIGP<br>SGKSNVMDALSFVILLNKHIDAYKTFPPEPKDKK<br>KADET                                                                                              |
| 132 | Q96CV9 | OPTN  | RTSDSDQQAY  | LMEMQSRHGARTSDSQQAYLVQRGAEDRD           |                                                                         |                                                                                                                                                                                                                                                                                                                                                                                                                                                    |
| 133 | Q9UBL0 | ARP21 | SSTDSSSNR   | LKWDHQRAWSSTDSSSNRNLKPAKMTAKT           |                                                                         |                                                                                                                                                                                                                                                                                                                                                                                                                                                    |
| 134 | Q92878 | RAD50 | ILVGPNGAGK  | QIITFSPFLTLVGPNGAGKTTIECLYI             |                                                                         |                                                                                                                                                                                                                                                                                                                                                                                                                                                    |
| 135 | A6NDA9 | LRIT2 | TCMASNSIGK  | AAHLVDSNGYTCMASNSIGKSNLVISLHVQ          |                                                                         |                                                                                                                                                                                                                                                                                                                                                                                                                                                    |
| 136 | Q13496 | MTM1  | KRTSRDGVNR  | NSHLENESIKRTRSDGVNRDLTEAVPRLP           |                                                                         |                                                                                                                                                                                                                                                                                                                                                                                                                                                    |
| 137 | Q53FE4 | CD017 | VKLPPNFTAK  | KPPTTVKSPPTVLPNFTAKSKVLTRDTEG           |                                                                         |                                                                                                                                                                                                                                                                                                                                                                                                                                                    |
| 138 | Q9P219 | DAPLE | STPGRNALGR  | RDLATLPREASTPGRNALGRHEYPRLNRIHQ         |                                                                         |                                                                                                                                                                                                                                                                                                                                                                                                                                                    |
| 139 | P04114 | APOB  | ILTDPDGKGGK | LHRNIQEYLSILTPDGKGEKIAELSATQV           |                                                                         |                                                                                                                                                                                                                                                                                                                                                                                                                                                    |
| 140 | Q8NDV3 | SMC1B | CIIGPNSGSK  | QVIGPFRFRFTCIIGPNSGSKSNVMDALSFV         |                                                                         |                                                                                                                                                                                                                                                                                                                                                                                                                                                    |
| 141 | Q6DN14 | MCTP1 | GLMAADVTGK  | FLQVKVIRAEGLMAADVTGKSDPFCVVELN          | TCR1a7_MC-15                                                            | FLQVKVIRAEGLMAADVTGKSDPFCVVELNKPQL<br>HSMVARSCLRNAAGKNYIIFGSPVGGGTRSVVEL<br>GIAANGINKLLDAKSLGLKAGKCKFERILEMDPSNV<br>QKGNLVCVYFEEPGDLAWNFLMKVQARDVTARD<br>SILSHKVLNDGGCCSSRDQCCPPNFTGKLCQIPV<br>HGASQQGQRSTPLIARNGHAKVVRLLLEHYRR<br>HPTDINILTLSDSNGKNRSSARILKQALQDSNR<br>GVRKKAADALGKLSIHIKVDPODFYKORLLISAPD<br>PSNRYKMQISMLQILLNKHIDAYKTFPPEPKDKK<br>KKADET                                                                                        |
| 142 | Q8N414 | PGBD5 | RSLCRNAAGK  | NKPQLHSMVARSCLRNAAGKNYIIFGSPSI          |                                                                         |                                                                                                                                                                                                                                                                                                                                                                                                                                                    |
| 143 | Q8NCS7 | CTL5  | LGAANGINK   | GNGGTRSVVELGIAANGINKLLDAKSLGLK          |                                                                         |                                                                                                                                                                                                                                                                                                                                                                                                                                                    |
| 144 | Q6ZXV5 | TMT3  | EMDPSNVQGGK | GAKKCKFERILEMDPSNVQGGKHNLCVYFEE         |                                                                         |                                                                                                                                                                                                                                                                                                                                                                                                                                                    |
| 145 | Q9BX69 | CARD6 | KVQARDVTAR  | PGDLAWNFLMKVQARDVTARDSILSHKVL           |                                                                         |                                                                                                                                                                                                                                                                                                                                                                                                                                                    |
| 146 | Q14766 | LTBP1 | CQCPNFTGK   | NGGQCSSRDQCCPPNFTGKLCQIPVHGAS           |                                                                         |                                                                                                                                                                                                                                                                                                                                                                                                                                                    |
| 147 | Q9UK73 | FEM1B | IIAARNGHAK  | QGGQGRSTPLIARNGHAKVVRLLLEHYRR           |                                                                         |                                                                                                                                                                                                                                                                                                                                                                                                                                                    |
| 148 | Q96QV1 | HHIP  | TILCSDSNGK  | RHPTDINILTLSDSNGKNRSSARILQI             |                                                                         |                                                                                                                                                                                                                                                                                                                                                                                                                                                    |
| 149 | Q92616 | GCN1  | RLKAADALGK  | KALQDSNRGVRKKAADALGKLSIHIKVDPO          |                                                                         |                                                                                                                                                                                                                                                                                                                                                                                                                                                    |
| 150 | Q60687 | SRPX2 | IISAPDPSNR  | DQFYEQRLLIISAPDPSNRYKMQISMLQ            |                                                                         |                                                                                                                                                                                                                                                                                                                                                                                                                                                    |
| 151 | Q8VWZ7 | ABCA5 | GLLGPNGAGK  | SFCVKKGEILGLLGPNGAGKSTIINILVGD          | TCR1a7_MC-16                                                            | SFCVKKGEILGLLGPNGAGKSTIINILVGDIGYCI<br>FDKRRSDPNFKNRLRERRKQKLTILGNQLDGIHLLD<br>PDVVARFQKQRYPDGIIDKEDWLNLYHLTCRVDIGK<br>ELQKQGRQEAFCFVPLDATFVMMVARDSENKGFV<br>NPLIPRRMENIIDQCLQKPADVIGKSMNAQICIPLEG<br>ESVTEIDISFLESPNPNKDYEEPVKRVEDGMTKGL<br>LRVTLSDSQVYQAGSNGOPLPDVDMATMNNKES<br>APNSGSKNDKSKVLTQGMELRDAGSQESSPSN<br>GHGKLAGSPYLGRILLNKHIDAYKTFPPEPKDKK<br>KKADET                                                                                 |
| 152 | Q15388 | TOM20 | RRSDPNFKNR  | IGYCIYDFKRRSDPNFKNRLRERRKQKQL           |                                                                         |                                                                                                                                                                                                                                                                                                                                                                                                                                                    |
| 153 | Q86U44 | MTA70 | HLLDPDVVAR  | ITLGNQLDGIHLLDPDVVARFQKQRYPDGI          |                                                                         |                                                                                                                                                                                                                                                                                                                                                                                                                                                    |
| 154 | Q9NQW7 | XPP1  | HLTCRVDIGK  | DKECDWLNLYHLTCRVDIGKELQKQGRQEA          |                                                                         |                                                                                                                                                                                                                                                                                                                                                                                                                                                    |
| 155 | Q9Y305 | ACOT9 | VMMVARDSENK | EFCFVPLDATFVMMVARDSENKGFVFNPLIP         |                                                                         |                                                                                                                                                                                                                                                                                                                                                                                                                                                    |
| 156 | Q9UJX5 | APC4  | LQKPADVIGK  | RRMENIIDQCLQKPADVIGKSMNAQICIPLEG        |                                                                         |                                                                                                                                                                                                                                                                                                                                                                                                                                                    |
| 157 | Q9UBV2 | SE1L1 | FLESPNPNK   | EGESVTEIDISFLESPNPNKDYEEPVKRVRK         |                                                                         |                                                                                                                                                                                                                                                                                                                                                                                                                                                    |
| 158 | Q95405 | ZFYV9 | VTLSDSQVGY  | EDGMTKGLRVTLDSDQVGYQAGSNGOPLP           |                                                                         |                                                                                                                                                                                                                                                                                                                                                                                                                                                    |
| 159 | Q92547 | TOPB1 | ESAPNSGSGK  | DVDNMATMNNKESAPNSGSKNDKSKVLTQT          |                                                                         |                                                                                                                                                                                                                                                                                                                                                                                                                                                    |
| 160 | Q7L9B9 | EEP1  | ESSPNSGHGK  | GMELRDAGSQESSPSNGHGLAGSPYLGRL           |                                                                         |                                                                                                                                                                                                                                                                                                                                                                                                                                                    |
| 161 | Q14526 | HIC1  | GVPGPDGKGGK | GALAGLGGPVGVPDGGKGLDFPEGVFAV            | GALAGLGGPVGVPDGGKGLDFPEGVFAVGPACP<br>TSCNGAAAPNSNCSGRPCVFGCVIPLPIQFGKIO |                                                                                                                                                                                                                                                                                                                                                                                                                                                    |
| 162 | Q9Y6R7 | FCGBP | AAAPNSCSGR  | GPACPTSCNGAAAPNSNCSGRPCVFGCVIPLPIQFGKIO |                                                                         |                                                                                                                                                                                                                                                                                                                                                                                                                                                    |

|     |        |       |                |                                        |              |                                                                                                                                                                                                                                                                   |
|-----|--------|-------|----------------|----------------------------------------|--------------|-------------------------------------------------------------------------------------------------------------------------------------------------------------------------------------------------------------------------------------------------------------------|
| 163 | Q5JUQ0 | FA78A | AISDSGVDNY     | LPDLQEGKIQAISDSGVDNYPWYGNTTETC         | TCR1a7_MC-17 | AISDSGVDNYPWYGNTTETCGSSVFLCYKKSVPAS<br>NAIAYKAGLIFRYPEAYRFHEFHSPALEDADFENK<br>MILLVGQYSVHSPITQGTPLTCSNVENRGRSRSHSP<br>AHASTTSDDDGNYTIMAANPQGRISCSGHLMVQSL<br>DVAKLLQRRAAADSAGKNGLTPLHVAAPDALS<br>VQGLGEGFSVYAAKSK<br>APRNP<br>LAKWAVGEGPLNEILLNKHIDAYKTFPPT<br>ET |
| 164 | Q5VZ89 | DEN4C | SVPASNAIAY     | GSSVFLCYKKSVPASNAIAYKAGLIFRYPE         |              |                                                                                                                                                                                                                                                                   |
| 165 | Q9H223 | EHD4  | ALEDADFENK     | AYRFHEFHSPALEDADFENKPMILLVGQYS         |              |                                                                                                                                                                                                                                                                   |
| 166 | P08235 | MCR   | LTCSPNVENR     | VHSPITQGTPLTCSNVENRGRSRSHSPAHA         |              |                                                                                                                                                                                                                                                                   |
| 167 | Q86TC9 | MYPN  | TIMAANPQGR     | STTSDDDGNYTIMAANPQGRISCSGHLMVQ         |              |                                                                                                                                                                                                                                                                   |
| 168 | Q01484 | ANK2  | RRAAADSAGK     | SLDVAKLLQRRAAADSAGKNGLTPLHVAA          |              |                                                                                                                                                                                                                                                                   |
| 169 | Q9NVT9 | ARMC1 | RDLAADPLNR     | PDALSVVQRLDLAADPLNRRRAIVDQGL           |              |                                                                                                                                                                                                                                                                   |
| 170 | Q09019 | DMWD  | SKAPRNPLAK     | GEGFSVYAAKSKAPRNPLAKWAVGEGPLNE         |              |                                                                                                                                                                                                                                                                   |
| 171 | P23381 | SYWC  | GFTDSDCIGK     | VTFNQVKGIFGFTDSDCIGKISFPAIQAAP         |              |                                                                                                                                                                                                                                                                   |
| 172 | Q14439 | GP176 | YIGSADFQAK     | TEDEEESEAKYIGSADFQAKEIFSTCLEGE         |              |                                                                                                                                                                                                                                                                   |
| 173 | Q7Z7A1 | CNTRL | IHSPSDVLGK     | KLKLGTGEMNIHSPSDVLGKSLADLQKQFS         |              |                                                                                                                                                                                                                                                                   |
| 174 | Q5HYK9 | ZN667 | KKLPPNQC<br>NK | APDSGSKCETKKLPPNQC<br>NKSGQ<br>SICQKLV |              |                                                                                                                                                                                                                                                                   |
|     |        |       |                |                                        |              |                                                                                                                                                                                                                                                                   |

Supplementary Table 12. List of primers used for TCR cloning derived from TCR1 libraries

| ID | Primer Name                 | Sequence (5' ~ 3')   | Usage                                |
|----|-----------------------------|----------------------|--------------------------------------|
| 1  | TCR1_Lib1_Forward_Primer_01 | GGACTCCGGCGTGACACAGA | RT&1st PCR primers                   |
| 2  | TCR1_Lib1_Reverse_Primer_01 | CGCTGTGCACTTCCTTGCCG |                                      |
| 3  | TCR1_Lib2_Forward_Primer_01 | GGAGGAAAACCCCGGCCCTA |                                      |
| 4  | TCR1_Lib2_Reverse_Primer_01 | AGGCACAGGGTGCTGTCCTG |                                      |
| 5  | TCR1_Lib1_Forward_Primer_02 | ACCGCCACCGGCCAAAGAGT | The nested PCR primers for TCR1 Lib1 |
| 6  | TCR1_Lib1_Reverse_Primer_02 | CCACCAGCTCAGTTCCACGT |                                      |
| 7  | TCR1_Lib2_Forward_Primer_02 | GAGAGCCGTGATCGCCTCCA | The nested PCR primers for TCR1 Lib2 |
| 8  | TCR1_Lib2_Reverse_Primer_02 | GGTTCTGGATGTTGGCCAGC |                                      |
